# Supplementary material for: Identification of Virulence Associated Region during Highly Pathogenic Porcine Reproductive and Respiratory Syndrome Virus during Attenuation In Vitro: Complex Question with Different Strain Backgrounds
Source: MDPI journal article supplement (doi:10.3390/v14010040), 2021-12-27
Supplement: s1 [file s1]

**Table S1.** Information of PRRSV strains and genome change during *in vitro* passage.

| Series | Name       | NO.      | 5'UTR |     |     |     |     |     | NSP1 |     |     |     |     |     |     |     |     |     |     |
|--------|------------|----------|-------|-----|-----|-----|-----|-----|------|-----|-----|-----|-----|-----|-----|-----|-----|-----|-----|
|        |            |          | 59    | 118 | 119 | 137 | 163 | 166 | 108  | 163 | 187 | 200 | 204 | 240 | 257 | 266 | 281 | 287 | 329 |
|        | VR2332     | EF536003 | T     | G   | A   | A   | C   | T   | A    | P   | G   | S   | R   | F   | H   | P   | E   | I   | Y   |
| HuN4   | HuN4       | EF635006 | C     | G   | G   | A   | C   | T   | A    | P   | G   | S   | R   | F   | C   | P   | K   | I   | Y   |
|        | HuN4-F40   | -        | T     | -   | -   | -   | -   | -   | -    | -   | -   | S   | -   | -   | H   | -   | E   | -   | -   |
|        | HuN4-F60   | -        | T     | -   | -   | -   | -   | -   | -    | -   | -   | F   | -   | -   | H   | -   | E   | -   | -   |
|        | HuN4-F112  | -        | T     | -   | -   | -   | -   | -   | -    | -   | -   | F   | -   | -   | H   | -   | E   | -   | -   |
| NT0801 | NT0801     | HQ315836 | T     | -   | -   | -   | -   | -   | -    | -   | -   | -   | -   | -   | H   | -   | E   | -   | -   |
|        | NT0801-P10 | KJ523894 | T     | -   | -   | -   | -   | -   | -    | -   | -   | -   | -   | -   | H   | -   | E   | -   | -   |
|        | NT0801-P30 | KJ523895 | T     | -   | -   | -   | -   | -   | -    | -   | -   | -   | -   | -   | H   | -   | E   | -   | -   |
|        | NT0801-P50 | KJ523896 | T     | -   | -   | -   | -   | -   | -    | -   | -   | -   | -   | -   | H   | -   | E   | -   | -   |
|        | NT0801-P80 | KJ523897 | T     | -   | -   | -   | -   | -   | -    | -   | -   | -   | -   | -   | H   | -   | E   | -   | -   |
| JXA1   | JXA1       | EF112445 | T     | -   | G   | -   | -   | -   | -    | -   | D   | -   | -   | F   | H   | -   | E   | -   | -   |
|        | JXA1 P10   | FJ548854 | T     | -   | G   | -   | -   | -   | -    | -   | G   | -   | -   | S   | H   | -   | E   | -   | -   |
|        | JXA1 P15   | FJ548855 | T     | -   | G   | -   | -   | -   | -    | -   | G   | -   | -   | S   | H   | -   | E   | -   | -   |
|        | JXA1 P45   | FJ548851 | T     | -   | G   | -   | -   | -   | -    | -   | G   | -   | -   | F   | H   | -   | E   | -   | -   |
|        | JXA1 P70   | FJ548852 | T     | -   | G   | -   | -   | -   | -    | -   | G   | -   | -   | F   | H   | -   | E   | -   | -   |
|        | JXA1 P80   | FJ548853 | T     | -   | G   | -   | -   | -   | -    | -   | G   | -   | -   | F   | H   | -   | E   | -   | -   |
|        | JXA1 P100  | KC422725 | T     | -   | G   | -   | -   | -   | -    | -   | G   | -   | -   | F   | H   | -   | E   | -   | -   |
|        | JXA1 P110  | KC422726 | T     | -   | G   | -   | -   | -   | -    | -   | G   | -   | -   | F   | H   | -   | E   | -   | -   |
|        | JXA1 P120  | KC422727 | T     | -   | G   | -   | -   | -   | -    | -   | G   | -   | -   | F   | H   | -   | E   | -   | -   |
|        | JXA1-P130  | KC422728 | T     | -   | G   | -   | -   | -   | -    | -   | G   | -   | -   | F   | H   | -   | E   | -   | -   |
|        | JXA1-P140  | KC422729 | T     | -   | Del | -   | -   | -   | -    | -   | G   | -   | -   | F   | H   | -   | E   | -   | -   |
|        | JXA1-P150  | KC422730 | T     | -   | Del | -   | -   | -   | -    | -   | G   | -   | -   | F   | H   | -   | E   | -   | -   |
|        | JXA1-P160  | KC422731 | T     | -   | Del | -   | -   | -   | -    | -   | G   | -   | -   | S   | H   | -   | E   | -   | -   |
|        | JXA1-P170  | JQ804986 | T     | -   | Del | -   | -   | -   | -    | -   | G   | -   | -   | F   | H   | -   | E   | -   | -   |
| JX143  | JX143      | EU708726 | T     | -   | -   | -   | T   | T   | P    | -   | -   | -   | -   | -   | Y   | -   | E   | -   | -   |
|        | JXM20      | GQ499193 | T     | -   | -   | -   | C   | C   | A    | -   | -   | -   | -   | -   | Y   | -   | E   | -   | -   |
|        | JXM40      | GQ499194 | T     | -   | -   | -   | C   | C   | A    | -   | -   | -   | -   | -   | Y   | -   | E   | -   | -   |

|        |            |          |      |    |     |    |    |    |    |    |    |    |     |     |     |     |     |     |     |
|--------|------------|----------|------|----|-----|----|----|----|----|----|----|----|-----|-----|-----|-----|-----|-----|-----|
|        | JXM60      | GQ499195 | T    | -  | -   | -  | C  | C  | A  | -  | -  | -  | -   | -   | Y   | -   | E   | -   | -   |
|        | JXM80      | GQ499196 | T    | -  | -   | -  | C  | C  | A  | -  | -  | -  | -   | -   | Y   | -   | E   | -   | -   |
|        | JXM100     | GQ475526 | T    | -  | -   | -  | C  | C  | A  | -  | -  | -  | -   | -   | Y   | -   | E   | -   | -   |
| GD     | GD         | EU825724 | T    | -  | -   | A  | -  | -  | -  | -  | -  | -  | -   | -   | Y   | -   | E   | -   | Y   |
|        | GD-P100    | GU143913 | T    | -  | -   | G  | -  | -  | -  | -  | -  | -  | -   | -   | Y   | -   | E   | -   | H   |
| GDQY1  | GDQY1      | JN387271 | T    | G  | G   | -  | -  | -  | -  | H  | -  | -  | -   | -   | H   | P   | E   | -   | -   |
|        | GDQY1VP65  | JN387272 | T    | T  | Del | -  | -  | -  | -  | P  | -  | -  | -   | -   | H   | P   | E   | -   | -   |
|        | GDQY1VP80  | JN387273 | T    | T  | Del | -  | -  | -  | -  | P  | -  | -  | -   | -   | H   | L   | E   | -   | -   |
|        | GDQY1VP100 | JN387274 | T    | T  | Del | -  | -  | -  | -  | P  | -  | -  | -   | -   | H   | L   | E   | -   | -   |
| BJ     | BJ         | EU825723 | T    | -  | -   | -  | -  | T  | -  | -  | -  | -  | R   | -   | Y   | -   | E   | -   | -   |
|        | BJ-F20     | KP890337 | T    | -  | -   | -  | -  | T  | -  | -  | -  | -  | R   | -   | Y   | -   | E   | -   | -   |
|        | BJ-F40     | KP890338 | T    | -  | -   | -  | -  | T  | -  | -  | -  | -  | R   | -   | Y   | -   | E   | -   | -   |
|        | BJ-F80     | KP890340 | T    | -  | -   | -  | -  | C  | -  | -  | -  | -  | R   | -   | Y   | -   | E   | -   | -   |
|        | BJ-F100    | KP890341 | T    | -  | -   | -  | -  | T  | -  | -  | -  | -  | C   | -   | Y   | -   | E   | -   | -   |
|        | BJ-F150    | KP890342 | T    | -  | -   | -  | -  | C  |    | -  | -  | -  | C   | -   | Y   | -   | E   | -   | -   |
| TP     | TP         | EU864233 | T    | -  | -   | -  | -  | -  | -  | -  | -  | -  | -   | -   | H   | -   | E   | I   | -   |
|        | TP_P60     | GU232736 | T    | -  | -   | -  | -  | -  | -  | -  | -  | -  | -   | -   | H   | -   | E   | T   | -   |
|        | TP_P90     | GU232737 | T    | -  | -   | -  | -  | -  | -  | -  | -  | -  | -   | -   | H   | -   | E   | I   | -   |
| BB0907 | BB0907     | HQ315835 | T    | -  | -   | -  | -  | -  | -  | -  | -  | -  | -   | -   | -   | -   | E   | -   | -   |
|        | BB0907-s34 | KM453698 | T    | -  | -   | -  | -  | -  | -  | -  | -  | -  | -   | -   | -   | -   | E   | -   | -   |
|        | BB0907-F44 | KM453699 | T    | -  | -   | -  | -  | -  | -  | -  | -  | -  | -   | -   | -   | -   | E   | -   | -   |
| Series | Name       | NO.      | NSP2 |    |     |    |    |    |    |    |    |    |     |     |     |     |     |     |     |
|        |            |          | 3    | 19 | 23  | 24 | 30 | 45 | 63 | 81 | 84 | 95 | 100 | 131 | 160 | 189 | 190 | 195 | 214 |
|        | VR2332     | EF536003 | G    | G  | S   | V  | A  | K  | I  | R  | D  | A  | R   | P   | E   | E   | M   | D   | H   |
| HuN4   | HuN4       | EF635006 | G    | H  | G   | T  | A  | K  | I  | R  | D  | T  | R   | P   | E   | E   | L   | N   | H   |
|        | HuN4-F40   | -        | -    | H  | -   | A  | -  | -  | -  | -  | -  | I  | -   | -   | -   | -   | -   | Y   | Y   |
|        | HuN4-F60   | -        | -    | H  | -   | A  | -  | -  | -  | -  | -  | I  | -   | -   | -   | -   | -   | Y   | Y   |
|        | HuN4-F112  | -        | -    | R  | -   | A  | -  | -  | -  | -  | -  | I  | -   | -   | -   | -   | -   | Y   | Y   |
| NT0801 | NT0801     | HQ315836 | -    | -  | -   | -  | -  | -  | -  | -  | -  | -  | -   | -   | -   | E   | -   | -   | -   |
|        | NT0801-P10 | KJ523894 | -    | -  | -   | -  | -  | -  | -  | -  | -  | -  | -   | -   | -   | E   | -   | -   | -   |
|        | NT0801-P30 | KJ523895 | -    | -  | -   | -  | -  | -  | -  | -  | -  | -  | -   | -   | -   | E   | -   | -   | -   |

|       |            |          |   |   |   |   |   |   |   |   |   |   |   |   |   |   |   |   |   |
|-------|------------|----------|---|---|---|---|---|---|---|---|---|---|---|---|---|---|---|---|---|
| JXA1  | NT0801-P50 | KJ523896 | - | - | - | - | - | - | - | - | - | - | - | - | - | E | - | - | - |
|       | NT0801-P80 | KJ523897 | - | - | - | - | - | - | - | - | - | - | - | - | - | A | - | - | - |
|       | JXA1       | EF112445 | - | - | - | - | - | - | - | - | - | T | - | P | - | - | L | - | - |
|       | JXA1 P10   | FJ548854 | - | - | - | - | - | - | - | - | - | T | - | L | - | - | L | - | - |
|       | JXA1 P15   | FJ548855 | - | - | - | - | - | - | - | - | - | T | - | P | - | - | L | - | - |
|       | JXA1 P45   | FJ548851 | - | - | - | - | - | - | - | - | - | T | - | L | - | - | L | - | - |
|       | JXA1 P70   | FJ548852 | - | - | - | - | - | - | - | - | - | I | - | P | - | - | L | - | - |
|       | JXA1 P80   | FJ548853 | - | - | - | - | - | - | - | - | - | T | - | P | - | - | S | - | - |
|       | JXA1 P100  | KC422725 | - | - | - | - | - | - | - | - | - | I | - | P | - | - | L | - | - |
|       | JXA1 P110  | KC422726 | - | - | - | - | - | - | - | - | - | T | - | P | - | - | S | - | - |
|       | JXA1 P120  | KC422727 | - | - | - | - | - | - | - | - | - | T | - | P | - | - | S | - | - |
|       | JXA1-P130  | KC422728 | - | - | - | - | - | - | - | - | - | T | - | P | - | - | S | - | - |
|       | JXA1-P140  | KC422729 | - | - | - | - | - | - | - | - | - | T | - | P | - | - | S | - | - |
|       | JXA1-P150  | KC422730 | - | - | - | - | - | - | - | - | - | T | - | P | - | - | S | - | - |
|       | JXA1-P160  | KC422731 | - | - | - | - | - | - | - | - | - | T | - | P | - | - | S | - | - |
|       | JXA1-P170  | JQ804986 | - | - | - | - | - | - | - | - | - | T | - | P | - | - | S | - | - |
| JX143 | JX143      | EU708726 | G | - | - | - | - | - | - | - | - | - | - | - | - | - | - | - | - |
|       | JXM20      | GQ499193 | G | - | - | - | - | - | - | - | - | - | - | - | - | - | - | - | - |
|       | JXM40      | GQ499194 | G | - | - | - | - | - | - | - | - | - | - | - | - | - | - | - | - |
|       | JXM60      | GQ499195 | G | - | - | - | - | - | - | - | - | - | - | - | - | - | - | - | - |
|       | JXM80      | GQ499196 | G | - | - | - | - | - | - | - | - | - | - | - | - | - | - | - | - |
|       | JXM100     | GQ475526 | R | - | - | - | - | - | - | - | - | - | - | - | - | - | - | - | - |
| GD    | GD         | EU825724 | - | - | - | - | - | - | - | - | - | - | - | - | - | - | - | - | - |
|       | GD-P100    | GU143913 | - | - | - | - | - | - | - | - | - | - | - | - | - | - | - | - | - |
| GDQY1 | GDQY1      | JN387271 | - | - | - | - | - | - | I | R | D | - | - | - | K | - | - | - | - |
|       | GDQY1VP65  | JN387272 | - | - | - | - | - | - | T | G | G | - | - | - | K | - | - | - | - |
|       | GDQY1VP80  | JN387273 | - | - | - | - | - | - | I | R | D | - | - | - | E | - | - | - | - |
|       | GDQY1VP100 | JN387274 | - | - | - | - | - | - | I | R | G | - | - | - | E | - | - | - | - |
| BJ    | BJ         | EU825723 | - | - | - | - | - | K | - | - | - | - | G | - | - | - | - | - | - |
|       | BJ-F20     | KP890337 | - | - | - | - | - | K | - | - | - | - | G | - | - | - | - | - | - |
|       | BJ-F40     | KP890338 | - | - | - | - | - | K | - | - | - | - | G | - | - | - | - | - | - |

|        |            |          |      |     |     |     |     |     |     |     |     |     |         |     |     |     |     |     |     |
|--------|------------|----------|------|-----|-----|-----|-----|-----|-----|-----|-----|-----|---------|-----|-----|-----|-----|-----|-----|
|        | BJ-F80     | KP890340 | -    | -   | -   | -   | -   | K   | -   | -   | -   | -   | R       | -   | -   | -   | -   | -   | -   |
|        | BJ-F100    | KP890341 | -    | -   | -   | -   | -   | E   | -   | -   | -   | -   | G       | -   | -   | -   | -   | -   | -   |
|        | BJ-F150    | KP890342 | -    | -   | -   | -   | -   | K   | -   | -   | -   | -   | R       | -   | -   | -   | -   | -   | -   |
| TP     | TP         | EU864233 | G    | -   | -   | -   | -   | -   | -   | -   | -   | -   | -       | -   | -   | -   | -   | -   | -   |
|        | TP_P60     | GU232736 | G    | -   | -   | -   | -   | -   | -   | -   | -   | -   | -       | -   | -   | -   | -   | -   | -   |
|        | TP_P90     | GU232737 | R    | -   | -   | -   | -   | -   | -   | -   | -   | -   | -       | -   | -   | -   | -   | -   | -   |
| BB0907 | BB0907     | HQ315835 | -    | -   | P   | -   | A   | -   | -   | -   | D   | -   | -       | -   | -   | -   | -   | -   | -   |
|        | BB0907-s34 | KM453698 | -    | -   | S   | -   | A   | -   | -   | -   | G   | -   | -       | -   | -   | -   | -   | -   | -   |
|        | BB0907-F44 | KM453699 | -    | -   | S   | -   | D   | -   | -   | -   | D   | -   | -       | -   | -   | -   | -   | -   | -   |
| Series | Name       | NO.      | NSP2 |     |     |     |     |     |     |     |     |     |         |     |     |     |     |     |     |
|        |            |          | 218  | 215 | 222 | 228 | 254 | 297 | 298 | 310 | 326 | 330 | 330-417 | 390 | 398 | 400 | 411 | 415 | 417 |
|        | VR2332     | EF536003 | N    | S   | Q   | I   | A   | E   | A   | Q   | N   | L   | -       | D   | K   | A   | W   | Q   | D   |
| HuN4   | HuN4       | EF635006 | D    | G   | Q   | I   | A   | E   | A   | L   | D   | L   | -       | D   | K   | A   | C   | Q   | D   |
|        | HuN4-F40   | -        | -    | R   | -   | -   | -   | -   | -   | S   | -   | -   | -       | -   | -   | -   | W   | -   | N   |
|        | HuN4-F60   | -        | -    | R   | -   | -   | -   | -   | -   | S   | -   | -   | -       | -   | -   | -   | W   | -   | N   |
|        | HuN4-F112  | -        | -    | R   | -   | -   | -   | -   | -   | S   | -   | -   | -       | -   | -   | -   | W   | -   | -   |
| NT0801 | NT0801     | HQ315836 | N    | R   | -   | -   | -   | -   | -   | S   | -   | P   | -       | -   | -   | V   | R   | -   | -   |
|        | NT0801-P10 | KJ523894 | N    | R   | -   | -   | -   | -   | -   | S   | -   | L   | -       | -   | -   | V   | R   | -   | -   |
|        | NT0801-P30 | KJ523895 | N    | R   | -   | -   | -   | -   | -   | S   | -   | L   | -       | -   | -   | V   | R   | -   | -   |
|        | NT0801-P50 | KJ523896 | N    | R   | -   | -   | -   | -   | -   | S   | -   | L   | -       | -   | -   | V   | R   | -   | -   |
|        | NT0801-P80 | KJ523897 | N    | R   | -   | -   | -   | -   | -   | S   | -   | L   | -       | -   | -   | V   | R   | -   | -   |
| JXA1   | JXA1       | EF112445 | D    | R   | -   | -   | T   | V   | -   | S   | -   | -   | -       | -   | K   | A   | W   | -   | -   |
|        | JXA1 P10   | FJ548854 | D    | R   | -   | -   | T   | V   | -   | S   | -   | -   | -       | -   | K   | T   | W   | -   | -   |
|        | JXA1 P15   | FJ548855 | D    | R   | -   | -   | A   | E   | -   | S   | -   | -   | -       | -   | K   | T   | W   | -   | -   |
|        | JXA1 P45   | FJ548851 | D    | R   | -   | -   | A   | E   | -   | S   | -   | -   | -       | -   | K   | T   | W   | -   | -   |
|        | JXA1 P70   | FJ548852 | D    | R   | -   | -   | A   | E   | -   | S   | -   | -   | -       | -   | K   | T   | W   | -   | -   |
|        | JXA1 P80   | FJ548853 | D    | R   | -   | -   | A   | E   | -   | S   | -   | -   | -       | -   | K   | T   | W   | -   | -   |
|        | JXA1 P100  | KC422725 | D    | R   | -   | -   | A   | E   | -   | S   | -   | -   | -       | -   | K   | T   | W   | -   | -   |
|        | JXA1 P110  | KC422726 | D    | R   | -   | -   | A   | E   | -   | S   | -   | -   | -       | -   | K   | T   | W   | -   | -   |
|        | JXA1 P120  | KC422727 | D    | R   | -   | -   | A   | E   | -   | S   | -   | -   | -       | -   | Q   | T   | W   | -   | -   |
|        | JXA1-P130  | KC422728 | D    | R   | -   | -   | A   | E   | -   | S   | -   | -   | -       | -   | E   | T   | W   | -   | -   |

|        |            |          |      |     |     |     |     |     |     |     |     |         |     |     |     |     |     |     |     |
|--------|------------|----------|------|-----|-----|-----|-----|-----|-----|-----|-----|---------|-----|-----|-----|-----|-----|-----|-----|
|        | JXA1-P140  | KC422729 | N    | R   | -   | -   | A   | E   | -   | S   | -   | -       | -   | -   | E   | T   | W   | -   | -   |
|        | JXA1-P150  | KC422730 | D    | R   | -   | -   | A   | E   | -   | S   | -   | -       | -   | -   | E   | T   | W   | -   | -   |
|        | JXA1-P160  | KC422731 | D    | R   | -   | -   | A   | E   | -   | S   | -   | -       | -   | -   | E   | T   | W   | -   | -   |
|        | JXA1-P170  | JQ804986 | D    | R   | -   | -   | A   | E   | -   | S   | -   | -       | -   | -   | E   | T   | W   | -   | -   |
| JX143  | JX143      | EU708726 | -    | R   | -   | -   | -   | -   | A   | S   | D   | -       | -   | -   | -   | A   | W   | -   | -   |
|        | JXM20      | GQ499193 | -    | R   | -   | -   | -   | -   | P   | S   | G   | -       | -   | -   | -   | T   | W   | -   | -   |
|        | JXM40      | GQ499194 | -    | R   | -   | -   | -   | -   | S   | S   | G   | -       | -   | -   | -   | T   | W   | -   | -   |
|        | JXM60      | GQ499195 | -    | R   | -   | -   | -   | -   | A   | S   | G   | -       | -   | -   | -   | T   | W   | H   | -   |
|        | JXM80      | GQ499196 | -    | R   | -   | -   | -   | -   | A   | S   | G   | -       | -   | -   | -   | A   | W   | -   | -   |
|        | JXM100     | GQ475526 | -    | R   | -   | -   | -   | -   | P   | S   | G   | -       | DEL |
| GD     | GD         | EU825724 | -    | R   | -   | -   | -   | -   | -   | S   | -   | -       | -   | D   | -   | -   | W   | -   | -   |
|        | GD-P100    | GU143913 | -    | R   | -   | -   | -   | -   | -   | S   | -   | -       | -   | N   | -   | -   | W   | -   | -   |
| GDQY1  | GDQY1      | JN387271 | -    | R   | Q   | I   | -   | -   | -   | S   | -   | -       | -   | -   | K   | -   | W   | -   | -   |
|        | GDQY1VP65  | JN387272 | -    | R   | Q   | I   | -   | -   | -   | S   | -   | -       | -   | -   | K   | -   | W   | -   | -   |
|        | GDQY1VP80  | JN387273 | -    | R   | Q   | I   | -   | -   | -   | S   | -   | -       | -   | -   | E   | -   | W   | -   | -   |
|        | GDQY1VP100 | JN387274 | -    | R   | R   | T   | -   | -   | -   | S   | -   | -       | -   | -   | E   | -   | W   | -   | -   |
| BJ     | BJ         | EU825723 | -    | I   | -   | -   | -   | -   | -   | S   | G   | -       | -   | -   | K   | -   | W   | -   | -   |
|        | BJ-F20     | KP890337 | -    | I   | -   | -   | -   | -   | -   | S   | G   | -       | -   | -   | K   | -   | W   | -   | -   |
|        | BJ-F40     | KP890338 | -    | I   | -   | -   | -   | -   | -   | S   | G   | -       | -   | -   | E   | -   | W   | -   | -   |
|        | BJ-F80     | KP890340 | -    | I   | -   | -   | -   | -   | -   | S   | G   | -       | -   | -   | E   | -   | W   | -   | -   |
|        | BJ-F100    | KP890341 | -    | I   | -   | -   | -   | -   | -   | S   | G   | -       | -   | -   | E   | -   | W   | -   | -   |
|        | BJ-F150    | KP890342 | -    | I   | -   | -   | -   | -   | -   | S   | G   | -       | -   | -   | E   | -   | W   | -   | -   |
| TP     | TP         | EU864233 | -    | R   | -   | -   | -   | -   | -   | S   | -   | -       | -   | -   | K   | -   | W   | -   | -   |
|        | TP_P60     | GU232736 | -    | R   | -   | -   | -   | -   | -   | S   | -   | -       | -   | -   | K   | -   | W   | -   | -   |
|        | TP_P90     | GU232737 | -    | R   | -   | -   | -   | -   | -   | S   | -   | -       | -   | -   | E   | -   | W   | -   | -   |
| BB0907 | BB0907     | HQ315835 | -    | -   | -   | -   | -   | -   | -   | S   | -   | -       | -   | -   | K   | -   | R   | -   | -   |
|        | BB0907-s34 | KM453698 | -    | -   | -   | -   | -   | -   | -   | S   | -   | -       | -   | -   | K   | -   | R   | -   | -   |
|        | BB0907-F44 | KM453699 | -    | -   | -   | -   | -   | -   | -   | S   | -   | -       | -   | -   | K   | -   | W   | -   | -   |
| Series | Name       | NO.      | NSP2 |     |     |     |     |     |     |     |     |         |     |     |     |     |     |     |     |
|        |            |          | 432  | 451 | 464 | 465 | 466 | 471 | 483 | 487 | 497 | 465-499 | 500 | 521 | 533 | 568 | 575 | 577 | 580 |
|        | VR2332     | EF536003 | P    | R   | D   | C   | G   | L   | A   | P   | A   | -       | S   | E   | S   | Q   | S   | S   | T   |

|        |            |          |   |   |   |   |   |   |   |   |   |   |   |   |   |   |   |   |   |
|--------|------------|----------|---|---|---|---|---|---|---|---|---|---|---|---|---|---|---|---|---|
| HuN4   | HuN4       | EF635006 | P | D | D | C | G | M | T | P | V | - | M | G | T | Q | S | S | T |
|        | HuN4-F40   | -        | - | G | - | - | - | - | - | - | M | - | - | - | - | - | P | - | - |
|        | HuN4-F60   | -        | - | G | - | - | - | - | - | - | M | - | - | - | - | - | P | - | - |
|        | HuN4-F112  | -        | - | G | - | - | - | - | - | - | M | - | - | - | - | - | P | - | - |
| NT0801 | NT0801     | HQ315836 | - | - | D | - | - | - | - | - | M | - | - | - | S | Q | - | - | T |
|        | NT0801-P10 | KJ523894 | - | - | D | - | - | - | - | - | M | - | - | - | S | Q | - | - | T |
|        | NT0801-P30 | KJ523895 | - | - | D | - | - | - | - | - | M | - | - | - | S | Q | - | - | T |
|        | NT0801-P50 | KJ523896 | - | - | G | - | - | - | - | - | M | - | - | - | S | R | - | - | A |
|        | NT0801-P80 | KJ523897 | - | - | G | - | - | - | - | - | M | - | - | - | S | R | - | - | A |
| JXA1   | JXA1       | EF112445 | - | G | - | - | G | M | - | - | M | - | - | G | - | - | - | - | - |
|        | JXA1 P10   | FJ548854 | - | G | - | - | G | M | - | - | M | - | - | G | - | - | - | - | - |
|        | JXA1 P15   | FJ548855 | - | G | - | - | G | M | - | - | M | - | - | G | - | - | - | - | - |
|        | JXA1 P45   | FJ548851 | - | G | - | - | G | M | - | - | M | - | - | G | - | - | - | - | - |
|        | JXA1 P70   | FJ548852 | - | G | - | - | S | M | - | - | M | - | - | G | - | - | - | - | - |
|        | JXA1 P80   | FJ548853 | - | G | - | - | G | M | - | - | M | - | - | G | - | - | - | - | - |
|        | JXA1 P100  | KC422725 | - | G | - | - | G | M | - | - | M | - | - | G | - | - | - | - | - |
|        | JXA1 P110  | KC422726 | - | G | - | - | G | M | - | - | M | - | - | G | - | - | - | - | - |
|        | JXA1 P120  | KC422727 | - | G | - | - | G | M | - | - | M | - | - | G | - | - | - | - | - |
|        | JXA1-P130  | KC422728 | - | G | - | - | G | M | - | - | M | - | - | G | - | - | - | - | - |
|        | JXA1-P140  | KC422729 | - | G | - | - | G | M | - | - | M | - | - | G | - | - | - | - | - |
|        | JXA1-P150  | KC422730 | - | G | - | - | G | M | - | - | M | - | - | G | - | - | - | - | - |
|        | JXA1-P160  | KC422731 | - | G | - | - | G | T | - | - | M | - | - | E | - | - | - | - | - |
|        | JXA1-P170  | JQ804986 | - | G | - | - | G | M | - | - | M | - | - | E | - | - | - | - | - |
| JX143  | JX143      | EU708726 | P | - | C | - | - | - | - | - | M | - | - | - | T | S | - | - | - |
|        | JXM20      | GQ499193 | P | - | C | - | - | - | - | - | M | - | - | - | T | S | - | - | - |
|        | JXM40      | GQ499194 | P | - | C | - | - | - | - | - | M | - | - | - | I | S | - | - | - |
|        | JXM60      | GQ499195 | S | - | R | - | - | - | - | - | M | - | - | - | T | S | - | - | - |
|        | JXM80      | GQ499196 | P | - | C | - | - | - | - | - | M | - | - | - | I | S | - | - | - |
|        | JXM100     | GQ475526 | P | - | C | - | - | - | - | - | M | - | - | - | I | P | - | - | - |
| GD     | GD         | EU825724 | - | G | - | - | - | - | - | - | M | - | - | - | - | - | - | - | - |
|        | GD-P100    | GU143913 | - | G | - | - | - | - | - | - | M | - | - | - | - | - | - | - | - |

|        |            |          |      |     |     |     |     |     |     |     |     |     |     |     |     |     |     |     |     |
|--------|------------|----------|------|-----|-----|-----|-----|-----|-----|-----|-----|-----|-----|-----|-----|-----|-----|-----|-----|
| GDQY1  | GDQY1      | JN387271 | -    | G   | -   | -   | -   | -   | -   | -   | M   | -   | M   | -   | -   | -   | -   | -   | -   |
|        | GDQY1VP65  | JN387272 | -    | G   | -   | -   | -   | -   | -   | -   | M   | -   | M   | -   | -   | -   | -   | -   | -   |
|        | GDQY1VP80  | JN387273 | -    | G   | -   | DEL | DEL | -   | -   | -   | M   | DEL | L   | -   | -   | -   | -   | -   | -   |
|        | GDQY1VP100 | JN387274 | -    | G   | -   | DEL | DEL | -   | -   | -   | M   | DEL | M   | -   | -   | -   | -   | -   | -   |
| BJ     | BJ         | EU825723 | -    | -   | -   | -   | -   | -   | -   | L   | M   | -   | -   | -   | -   | -   | -   | -   | -   |
|        | BJ-F20     | KP890337 | -    | -   | -   | -   | -   | -   | -   | L   | M   | -   | -   | -   | -   | -   | -   | -   | -   |
|        | BJ-F40     | KP890338 | -    | -   | -   | -   | -   | -   | -   | L   | M   | -   | -   | -   | -   | -   | -   | -   | -   |
|        | BJ-F80     | KP890340 | -    | -   | -   | -   | -   | -   | -   | L   | M   | -   | -   | -   | -   | -   | -   | -   | -   |
|        | BJ-F100    | KP890341 | -    | -   | -   | -   | -   | -   | -   | L   | M   | -   | -   | -   | -   | -   | -   | -   | -   |
|        | BJ-F150    | KP890342 | -    | -   | -   | -   | -   | -   | -   | L   | M   | -   | -   | -   | -   | -   | -   | -   | -   |
| TP     | TP         | EU864233 | -    | G   | -   | -   | -   | -   | T   | -   | M   | -   | -   | -   | -   | -   | -   | S   | -   |
|        | TP_P60     | GU232736 | -    | G   | -   | -   | -   | -   | T   | -   | M   | -   | -   | -   | -   | -   | -   | P   | -   |
|        | TP_P90     | GU232737 | -    | G   | -   | -   | -   | -   | I   | -   | M   | -   | -   | -   | -   | -   | -   | P   | -   |
| BB0907 | BB0907     | HQ315835 | -    | -   | -   | -   | -   | -   | -   | P   | M   | -   | -   | -   | -   | -   | -   | -   | -   |
|        | BB0907-s34 | KM453698 | -    | -   | -   | -   | -   | -   | -   | S   | M   | -   | -   | -   | -   | -   | -   | -   | -   |
|        | BB0907-F44 | KM453699 | -    | -   | -   | -   | -   | -   | -   | P   | M   | -   | -   | -   | -   | -   | -   | -   | -   |
| Series | Name       | NO.      | NSP2 |     |     |     |     |     |     |     |     |     |     |     |     |     |     |     |     |
|        |            |          | 581  | 582 | 590 | 599 | 605 | 613 | 614 | 627 | 645 | 675 | 678 | 697 | 700 | 711 | 784 | 793 | 802 |
|        | VR2332     | EF536003 | E    | Y   | P   | E   | E   | M   | S   | S   | D   | D   | A   | N   | V   | L   | D   | I   | T   |
| HuN4   | HuN4       | EF635006 | E    | Y   | S   | G   | E   | I   | L   | S   | D   | S   | D   | N   | A   | F   | C   | M   | I   |
|        | HuN4-F40   | -        | -    | -   | -   | -   | -   | -   | -   | P   | -   | G   | A   | -   | -   | -   | S   | -   | M   |
|        | HuN4-F60   | -        | -    | -   | -   | -   | -   | -   | -   | P   | -   | G   | A   | -   | -   | -   | S   | -   | M   |
|        | HuN4-F112  | -        | -    | -   | -   | -   | -   | -   | -   | P   | -   | G   | A   | -   | -   | -   | S   | -   | M   |
| NT0801 | NT0801     | HQ315836 | -    | -   | -   | V   | -   | -   | -   | -   | -   | G   | A   | -   | -   | L   | -   | I   | V   |
|        | NT0801-P10 | KJ523894 | -    | -   | -   | V   | -   | -   | -   | -   | -   | G   | A   | -   | -   | L   | -   | I   | V   |
|        | NT0801-P30 | KJ523895 | -    | -   | -   | V   | -   | -   | -   | -   | -   | G   | A   | -   | -   | L   | -   | I   | V   |
|        | NT0801-P50 | KJ523896 | -    | -   | -   | V   | -   | -   | -   | -   | -   | G   | A   | -   | -   | L   | -   | I   | V   |
|        | NT0801-P80 | KJ523897 | -    | -   | -   | V   | -   | -   | -   | -   | -   | G   | A   | -   | -   | L   | -   | I   | V   |
| JXA1   | JXA1       | EF112445 | E    | -   | -   | G   | E   | -   | -   | -   | -   | G   | A   | -   | -   | -   | -   | -   | M   |
|        | JXA1 P10   | FJ548854 | E    | -   | -   | R   | G   | -   | -   | -   | -   | G   | A   | -   | -   | -   | -   | -   | M   |
|        | JXA1 P15   | FJ548855 | E    | -   | -   | R   | G   | -   | -   | -   | -   | G   | A   | -   | -   | -   | -   | -   | M   |

|       |            |          |   |   |   |   |   |   |   |   |   |   |   |   |   |   |   |   |   |
|-------|------------|----------|---|---|---|---|---|---|---|---|---|---|---|---|---|---|---|---|---|
|       | JXA1 P45   | FJ548851 | E | - | - | R | G | - | - | - | - | G | A | - | - | - | - | - | M |
|       | JXA1 P70   | FJ548852 | E | - | - | R | G | - | - | - | - | G | A | - | - | - | - | - | M |
|       | JXA1 P80   | FJ548853 | E | - | - | R | G | - | - | - | - | G | A | - | - | - | - | - | M |
|       | JXA1 P100  | KC422725 | E | - | - | R | G | - | - | - | - | G | A | - | - | - | - | - | M |
|       | JXA1 P110  | KC422726 | E | - | - | R | G | - | - | - | - | G | A | - | - | - | - | - | M |
|       | JXA1 P120  | KC422727 | E | - | - | R | G | - | - | - | - | G | A | - | - | - | - | - | M |
|       | JXA1-P130  | KC422728 | E | - | - | R | G | - | - | - | - | G | A | - | - | - | - | - | M |
|       | JXA1-P140  | KC422729 | E | - | - | R | G | - | - | - | - | G | A | - | - | - | - | - | M |
|       | JXA1-P150  | KC422730 | E | - | - | R | G | - | - | - | - | G | A | - | - | - | - | - | M |
|       | JXA1-P160  | KC422731 | G | - | - | R | G | - | - | - | - | G | A | - | - | - | - | - | M |
| JX143 | JXA1-P170  | JQ804986 | E | - | - | R | G | - | - | - | - | G | A | - | - | - | - | - | M |
|       | JX143      | EU708726 | - | Y | - | - | - | - | - | - | - | - | A | - | - | - | - | - | - |
|       | JXM20      | GQ499193 | - | Y | - | - | - | - | - | - | - | - | A | - | - | - | - | - | - |
|       | JXM40      | GQ499194 | - | Y | - | - | - | - | - | - | - | - | A | - | - | - | - | - | - |
|       | JXM60      | GQ499195 | - | Y | - | - | - | - | - | - | - | - | A | - | - | - | - | - | - |
|       | JXM80      | GQ499196 | - | Y | - | - | - | - | - | - | - | - | A | - | - | - | - | - | - |
| GD    | JXM100     | GQ475526 | - | H | - | - | - | - | - | - | - | - | A | - | - | - | - | - | - |
|       | GD         | EU825724 | - | - | - | - | - | - | - | - | - | G | A | - | - | F | - | - | M |
| GDQY1 | GD-P100    | GU143913 | - | - | - | - | - | - | - | - | - | G | A | - | - | L | - | - | M |
|       | GDQY1      | JN387271 | E | - | - | - | - | - | - | - | D | G | A | - | A | - | - | - | M |
|       | GDQY1VP65  | JN387272 | G | - | - | - | - | - | - | - | N | G | A | - | A | - | - | - | M |
|       | GDQY1VP80  | JN387273 | E | - | - | - | - | - | - | - | N | G | A | - | T | - | - | - | M |
|       | GDQY1VP100 | JN387274 | G | - | - | - | - | - | - | - | N | G | A | - | A | - | - | - | M |
| BJ    | BJ         | EU825723 | - | - | - | - | - | V | - | - | - | - | A | - | - | - | - | - | - |
|       | BJ-F20     | KP890337 | - | - | - | - | - | V | - | - | - | - | A | - | - | - | - | - | - |
|       | BJ-F40     | KP890338 | - | - | - | - | - | V | - | - | - | - | A | - | - | - | - | - | - |
|       | BJ-F80     | KP890340 | - | - | - | - | - | V | - | - | - | - | A | - | - | - | - | - | - |
|       | BJ-F100    | KP890341 | - | - | - | - | - | V | - | - | - | - | A | - | - | - | - | - | - |
|       | BJ-F150    | KP890342 | - | - | - | - | - | V | - | - | - | - | A | - | - | - | - | - | - |
| TP    | TP         | EU864233 | - | - | S | - | - | I | - | - | - | G | A | N | - | F | - | M | M |
|       | TP_P60     | GU232736 | - | - | S | - | - | I | - | - | - | G | A | D | - | F | - | M | M |



|        | TP_P90     | GU232737 | -    | -   | P   | -   | -    | T    | -    | -    | -  | G  | A  | D  | -   | S   | -   | T   | M    |
|--------|------------|----------|------|-----|-----|-----|------|------|------|------|----|----|----|----|-----|-----|-----|-----|------|
| BB0907 | BB0907     | HQ315835 | -    | K   | -   | -   | -    | -    | L    | -    | -  | -  | A  | -  | -   | -   | -   | -   | -    |
|        | BB0907-s34 | KM453698 | -    | K   | -   | -   | -    | -    | L    | -    | -  | -  | A  | -  | -   | -   | -   | -   | -    |
|        | BB0907-F44 | KM453699 | -    | K   | -   | -   | -    | -    | P    | -    | -  | -  | A  | -  | -   | -   | -   | -   | -    |
| Series | Name       | NO.      | NSP2 |     |     |     |      |      |      | NSP3 |    |    |    |    |     |     |     |     | NSP4 |
|        |            |          | 803  | 809 | 814 | 815 | 1040 | 1099 | 1177 | 6    | 13 | 86 | 95 | 96 | 133 | 164 | 175 | 176 |      |
|        | VR2332     | EF536003 | S    | T   | S   | F   | S    | A    | V    | M    | C  | V  | M  | A  | C   | V   | V   | A   | D    |
| HuN4   | HuN4       | EF635006 | I    | T   | S   | F   | S    | A    | T    | I    | C  | V  | V  | A  | W   | V   | I   | A   | D    |
|        | HuN4-F40   | -        | -    | -   | -   | -   | -    | -    | -    | -    | -  | -  | M  | A  | -   | -   | -   | -   | -    |
|        | HuN4-F60   | -        | -    | -   | -   | -   | -    | -    | -    | -    | -  | -  | M  | V  | -   | -   | -   | -   | -    |
|        | HuN4-F112  | -        | -    | -   | -   | -   | -    | -    | -    | -    | -  | -  | M  | V  | -   | -   | -   | -   | -    |
| NT0801 | NT0801     | HQ315836 | M    | -   | -   | -   | -    | -    | I    | F    | -  | -  | M  | -  | -   | -   | -   | -   | -    |
|        | NT0801-P10 | KJ523894 | M    | -   | -   | -   | -    | -    | I    | F    | -  | -  | M  | -  | -   | -   | -   | -   | -    |
|        | NT0801-P30 | KJ523895 | M    | -   | -   | -   | -    | -    | I    | F    | -  | -  | M  | -  | -   | -   | -   | -   | -    |
|        | NT0801-P50 | KJ523896 | M    | -   | -   | -   | -    | -    | I    | F    | -  | -  | M  | -  | -   | -   | -   | -   | -    |
|        | NT0801-P80 | KJ523897 | M    | -   | -   | -   | -    | -    | I    | F    | -  | -  | M  | -  | -   | -   | -   | -   | -    |
| JXA1   | JXA1       | EF112445 | I    | -   | -   | -   | S    | T    | -    | -    | R  | -  | M  | -  | -   | -   | I   | -   | -    |
|        | JXA1 P10   | FJ548854 | I    | -   | -   | -   | L    | A    | -    | -    | C  | -  | M  | -  | -   | -   | I   | -   | -    |
|        | JXA1 P15   | FJ548855 | I    | -   | -   | -   | L    | A    | -    | -    | C  | -  | M  | -  | -   | -   | I   | -   | -    |
|        | JXA1 P45   | FJ548851 | I    | -   | -   | -   | L    | A    | -    | -    | C  | -  | M  | -  | -   | -   | I   | -   | -    |
|        | JXA1 P70   | FJ548852 | I    | -   | -   | -   | L    | T    | -    | -    | C  | -  | M  | -  | -   | -   | I   | -   | -    |
|        | JXA1 P80   | FJ548853 | M    | -   | -   | -   | L    | T    | -    | -    | C  | -  | M  | -  | -   | -   | I   | -   | -    |
|        | JXA1 P100  | KC422725 | M    | -   | -   | -   | L    | T    | -    | -    | C  | -  | M  | -  | -   | -   | I   | -   | -    |
|        | JXA1 P110  | KC422726 | M    | -   | -   | -   | L    | T    | -    | -    | C  | -  | M  | -  | -   | -   | T   | -   | -    |
|        | JXA1 P120  | KC422727 | I    | -   | -   | -   | L    | T    | -    | -    | C  | -  | M  | -  | -   | -   | T   | -   | -    |
|        | JXA1-P130  | KC422728 | M    | -   | -   | -   | L    | T    | -    | -    | C  | -  | M  | -  | -   | -   | T   | -   | -    |
|        | JXA1-P140  | KC422729 | I    | -   | -   | -   | L    | T    | -    | -    | C  | -  | M  | -  | -   | -   | T   | -   | -    |
|        | JXA1-P150  | KC422730 | M    | -   | -   | -   | L    | T    | -    | -    | C  | -  | M  | -  | -   | -   | T   | -   | -    |
|        | JXA1-P160  | KC422731 | M    | -   | -   | -   | L    | T    | -    | -    | C  | -  | M  | -  | -   | -   | T   | -   | -    |
|        | JXA1-P170  | JQ804986 | I    | -   | -   | -   | L    | T    | -    | -    | C  | -  | M  | -  | -   | -   | T   | -   | -    |
| JX143  | JX143      | EU708726 | -    | -   | -   | -   | -    | -    | -    | -    | -  | -  | M  | -  | C   | I   | V   | -   | D    |

|        | JXM20      | GQ499193 | -    | -  | -   | -   | -   | -   | -   | -   | -    | -  | M   | -    | W  | V  | I  | -   | A   |
|--------|------------|----------|------|----|-----|-----|-----|-----|-----|-----|------|----|-----|------|----|----|----|-----|-----|
|        | JXM40      | GQ499194 | -    | -  | -   | -   | -   | -   | -   | -   | -    | -  | M   | -    | W  | V  | I  | -   | A   |
|        | JXM60      | GQ499195 | -    | -  | -   | -   | -   | -   | -   | -   | -    | -  | M   | -    | W  | V  | I  | -   | A   |
|        | JXM80      | GQ499196 | -    | -  | -   | -   | -   | -   | -   | -   | -    | -  | M   | -    | W  | V  | I  | -   | A   |
|        | JXM100     | GQ475526 | -    | -  | -   | -   | -   | -   | -   | -   | -    | -  | M   | -    | W  | V  | I  | -   | A   |
| GD     | GD         | EU825724 | -    | -  | -   | -   | -   | -   | -   | -   | -    | V  | M   | -    | -  | -  | -  | -   | -   |
|        | GD-P100    | GU143913 | -    | -  | -   | -   | -   | -   | -   | -   | -    | G  | M   | -    | -  | -  | -  | -   | -   |
| GDQY1  | GDQY1      | JN387271 | -    | -  | -   | -   | -   | -   | -   | -   | -    | -  | M   | A    | -  | -  | -  | -   | -   |
|        | GDQY1VP65  | JN387272 | -    | -  | -   | -   | -   | -   | -   | -   | -    | -  | M   | A    | -  | -  | -  | -   | -   |
|        | GDQY1VP80  | JN387273 | -    | -  | -   | -   | -   | -   | -   | -   | -    | -  | M   | A    | -  | -  | -  | -   | -   |
|        | GDQY1VP100 | JN387274 | -    | -  | -   | -   | -   | -   | -   | -   | -    | -  | M   | V    | -  | -  | -  | -   | -   |
| BJ     | BJ         | EU825723 | -    | T  | -   | -   | -   | -   | -   | I   | -    | -  | M   | -    | -  | -  | -  | A   | -   |
|        | BJ-F20     | KP890337 | -    | T  | -   | -   | -   | -   | -   | I   | -    | -  | M   | -    | -  | -  | -  | A   | -   |
|        | BJ-F40     | KP890338 | -    | T  | -   | -   | -   | -   | -   | I   | -    | -  | M   | -    | -  | -  | -  | A   | -   |
|        | BJ-F80     | KP890340 | -    | A  | -   | -   | -   | -   | -   | T   | -    | -  | M   | -    | -  | -  | -  | A   | -   |
|        | BJ-F100    | KP890341 | -    | A  | -   | -   | -   | -   | -   | T   | -    | -  | M   | -    | -  | -  | -  | T   | -   |
|        | BJ-F150    | KP890342 | -    | A  | -   | -   | -   | -   | -   | T   | -    | -  | M   | -    | -  | -  | -  | A   | -   |
| TP     | TP         | EU864233 | -    | -  | -   | -   | -   | -   | T   | -   | -    | -  | M   | -    | -  | -  | I  | -   | -   |
|        | TP_P60     | GU232736 | -    | -  | -   | -   | -   | -   | A   | -   | -    | -  | M   | -    | -  | -  | I  | -   | -   |
|        | TP_P90     | GU232737 | -    | -  | -   | -   | -   | -   | T   | -   | -    | -  | M   | -    | -  | -  | T  | -   | -   |
| BB0907 | BB0907     | HQ315835 | -    | -  | S   | F   | -   | -   | -   | -   | -    | -  | M   | -    | -  | -  | -  | -   | -   |
|        | BB0907-s34 | KM453698 | -    | -  | L   | F   | -   | -   | -   | -   | -    | -  | M   | -    | -  | -  | -  | -   | -   |
|        | BB0907-F44 | KM453699 | -    | -  | S   | S   | -   | -   | -   | -   | -    | -  | M   | -    | -  | -  | -  | -   | -   |
| Series | Name       | NO.      | NSP4 |    |     |     |     |     |     |     | NSP5 |    |     | NSP7 |    |    |    |     |     |
|        |            |          | 81   | 92 | 151 | 155 | 163 | 175 | 184 | 199 | 7    | 85 | 120 | 51   | 52 | 76 | 96 | 104 | 117 |
|        | VR2332     | EF536003 | Q    | Y  | F   | A   | S   | D   | K   | A   | Q    | S  | M   | V    | E  | V  | S  | S   | L   |
| HuN4   | HuN4       | EF635006 | Q    | Y  | F   | K   | C   | D   | K   | A   | Q    | S  | I   | I    | E  | V  | S  | S   | L   |
|        | HuN4-F40   | -        | -    | -  | -   | -   | S   | -   | -   | A   | -    | -  | M   | I    | -  | -  | -  | -   | -   |
|        | HuN4-F60   | -        | -    | -  | -   | -   | S   | -   | -   | A   | -    | -  | M   | I    | -  | -  | -  | -   | -   |
|        | HuN4-F112  | -        | -    | -  | -   | -   | S   | -   | -   | V   | -    | -  | M   | V    | -  | -  | -  | -   | -   |
| NT0801 | NT0801     | HQ315836 | -    | -  | -   | T   | S   | -   | -   | -   | -    | -  | M   | -    | -  | -  | -  | -   | -   |

|       |            |          |   |   |   |   |   |   |   |   |   |   |   |   |   |   |   |   |   |
|-------|------------|----------|---|---|---|---|---|---|---|---|---|---|---|---|---|---|---|---|---|
|       | NT0801-P10 | KJ523894 | - | - | - | T | S | - | - | - | - | - | M | - | - | - | - | - | - |
|       | NT0801-P30 | KJ523895 | - | - | - | T | S | - | - | - | - | - | M | - | - | - | - | - | - |
|       | NT0801-P50 | KJ523896 | - | - | - | T | S | - | - | - | - | - | M | - | - | - | - | - | - |
|       | NT0801-P80 | KJ523897 | - | - | - | T | S | - | - | - | - | - | M | - | - | - | - | - | - |
| JXA1  | JXA1       | EF112445 | - | - | - | K | S | - | K | - | - | - | M | - | - | - | - | - | - |
|       | JXA1 P10   | FJ548854 | - | - | - | K | S | - | K | - | - | - | M | - | - | - | - | - | - |
|       | JXA1 P15   | FJ548855 | - | - | - | K | S | - | K | - | - | - | M | - | - | - | - | - | - |
|       | JXA1 P45   | FJ548851 | - | - | - | K | S | - | K | - | - | - | M | - | - | - | - | - | - |
|       | JXA1 P70   | FJ548852 | - | - | - | K | S | - | K | - | - | - | M | - | - | - | - | - | - |
|       | JXA1 P80   | FJ548853 | - | - | - | K | S | - | K | - | - | - | M | - | - | - | - | - | - |
|       | JXA1 P100  | KC422725 | - | - | - | K | S | - | K | - | - | - | M | - | - | - | - | - | - |
|       | JXA1 P110  | KC422726 | - | - | - | K | S | - | K | - | - | - | M | - | - | - | - | - | - |
|       | JXA1 P120  | KC422727 | - | - | - | K | S | - | K | - | - | - | M | - | - | - | - | - | - |
|       | JXA1-P130  | KC422728 | - | - | - | K | S | - | E | - | - | - | M | - | - | - | - | - | - |
|       | JXA1-P140  | KC422729 | - | - | - | K | S | - | K | - | - | - | M | - | - | - | - | - | - |
|       | JXA1-P150  | KC422730 | - | - | - | K | S | - | K | - | - | - | M | - | - | - | - | - | - |
|       | JXA1-P160  | KC422731 | - | - | - | Q | S | - | K | - | - | - | M | - | - | - | - | - | - |
|       | JXA1-P170  | JQ804986 | - | - | - | K | S | - | K | - | - | - | M | - | - | - | - | - | - |
| JX143 | JX143      | EU708726 | - | - | - | - | S | - | - | - | - | - | M | - | E | - | - | S | - |
|       | JXM20      | GQ499193 | - | - | - | - | S | - | - | - | - | - | M | - | E | - | - | S | - |
|       | JXM40      | GQ499194 | - | - | - | - | S | - | - | - | - | - | M | - | G | - | - | S | - |
|       | JXM60      | GQ499195 | - | - | - | - | S | - | - | - | - | - | M | - | E | - | - | S | - |
|       | JXM80      | GQ499196 | - | - | - | - | S | - | - | - | - | - | M | - | E | - | - | S | - |
|       | JXM100     | GQ475526 | - | - | - | - | S | - | - | - | - | - | M | - | E | - | - | G | - |
| GD    | GD         | EU825724 | Q | Y | - | - | S | - | - | - | - | S | M | - | - | - | - | - | - |
|       | GD-P100    | GU143913 | R | H | - | - | S | - | - | - | - | C | M | - | - | - | - | - | - |
| GDQY1 | GDQY1      | JN387271 | - | - | - | - | S | - | K | - | K | - | M | - | - | - | - | - | - |
|       | GDQY1VP65  | JN387272 | - | - | - | - | S | - | E | - | Q | - | M | - | - | - | - | - | - |
|       | GDQY1VP80  | JN387273 | - | - | - | - | S | - | E | - | Q | - | M | - | - | - | - | - | - |
|       | GDQY1VP100 | JN387274 | - | - | - | - | S | - | E | - | Q | - | M | - | - | - | - | - | - |
| BJ    | BJ         | EU825723 | - | - | F | - | S | - | - | - | - | - | M | - | - | V | S | - | L |

[illegible]

|        |            |          |      |   |   |   |   |   |       |   |   |   |   |   |   |   |   |   |       |
|--------|------------|----------|------|---|---|---|---|---|-------|---|---|---|---|---|---|---|---|---|-------|
|        | JXA1 P120  | KC422727 | -    | - | S | - | I | - | -     | - | - | - | - | - | - | - | - | - | -     |
|        | JXA1-P130  | KC422728 | -    | - | S | - | I | - | -     | - | - | - | - | - | - | - | - | - | -     |
|        | JXA1-P140  | KC422729 | -    | - | S | - | I | - | -     | - | - | - | - | - | - | - | - | - | -     |
|        | JXA1-P150  | KC422730 | -    | - | S | - | I | - | -     | - | - | - | - | - | - | - | - | - | -     |
|        | JXA1-P160  | KC422731 | -    | - | S | - | T | - | -     | - | - | - | - | - | - | - | - | - | -     |
|        | JXA1-P170  | JQ804986 | -    | - | S | - | I | - | -     | - | - | - | - | - | - | - | - | - | -     |
| JX143  | JX143      | EU708726 | -    | N | N | R | - | - | -     | - | L | G | - | E | - | - | - | - | -     |
|        | JXM20      | GQ499193 | -    | N | N | R | - | - | -     | - | F | G | - | G | - | - | - | - | -     |
|        | JXM40      | GQ499194 | -    | N | N | G | - | - | -     | - | L | G | - | E | - | - | - | - | -     |
|        | JXM60      | GQ499195 | -    | S | K | R | - | - | -     | - | L | G | - | E | - | - | - | - | -     |
|        | JXM80      | GQ499196 | -    | N | N | R | - | - | -     | - | L | R | - | E | - | - | - | - | -     |
|        | JXM100     | GQ475526 | -    | S | N | R | - | - | -     | - | L | G | - | E | - | - | - | - | -     |
| GD     | GD         | EU825724 | -    | - | - | - | - | W | -     | - | - | - | - | - | - | - | - | - | -     |
|        | GD-P100    | GU143913 | -    | - | - | - | - | R | -     | - | - | - | - | - | - | - | - | - | -     |
| GDQY1  | GDQY1      | JN387271 | K    | - | - | - | - | - | -     | - | - | - | - | - | A | - | C | E | L     |
|        | GDQY1VP65  | JN387272 | K    | - | - | - | - | - | -     | - | - | - | - | - | A | - | C | E | L     |
|        | GDQY1VP80  | JN387273 | N    | - | - | - | - | - | -     | - | - | - | - | - | A | - | F | K | I     |
|        | GDQY1VP100 | JN387274 | N    | - | - | - | - | - | -     | - | - | - | - | - | S | - | C | K | L     |
| BJ     | BJ         | EU825723 | -    | - | - | - | - | - | -     | - | - | - | - | - | - | - | - | - | -     |
|        | BJ-F20     | KP890337 | -    | - | - | - | - | - | -     | - | - | - | - | - | - | - | - | - | -     |
|        | BJ-F40     | KP890338 | -    | - | - | - | - | - | -     | - | - | - | - | - | - | - | - | - | -     |
|        | BJ-F80     | KP890340 | -    | - | - | - | - | - | -     | - | - | - | - | - | - | - | - | - | -     |
|        | BJ-F100    | KP890341 | -    | - | - | - | - | - | -     | - | - | - | - | - | - | - | - | - | -     |
|        | BJ-F150    | KP890342 | -    | - | - | - | - | - | -     | - | - | - | - | - | - | - | - | - | -     |
| TP     | TP         | EU864233 | -    | - | - | - | - | - | -     | - | - | - | - | - | - | T | - | - | -     |
|        | TP_P60     | GU232736 | -    | - | - | - | - | - | -     | - | - | - | - | - | - | T | - | - | -     |
|        | TP_P90     | GU232737 | -    | - | - | - | - | - | -     | - | - | - | - | - | - | T | - | - | -     |
| BB0907 | BB0907     | HQ315835 | -    | - | - | - | - | - | S     | - | - | - | - | - | - | - | - | - | -     |
|        | BB0907-s34 | KM453698 | -    | - | - | - | - | - | G     | - | - | - | - | - | - | - | - | - | -     |
|        | BB0907-F44 | KM453699 | -    | - | - | - | - | - | G     | - | - | - | - | - | - | - | - | - | -     |
| Series | Name       | NO.      | NSP9 |   |   |   |   |   | NSP10 |   |   |   |   |   |   |   |   |   | NSP11 |

|        |            |          |     |     |     |     |     |     |     |   |    |    |    |     |     |     |     |     |    |
|--------|------------|----------|-----|-----|-----|-----|-----|-----|-----|---|----|----|----|-----|-----|-----|-----|-----|----|
|        |            |          | 254 | 274 | 362 | 420 | 411 | 502 | 554 | 6 | 59 | 69 | 73 | 114 | 204 | 275 | 366 | 393 | 52 |
|        | VR2332     | EF536003 | L   | P   | M   | E   | V   | I   | I   | V | K  | E  | Y  | D   | R   | T   | H   | A   | A  |
| HuN4   | HuN4       | EF635006 | L   | P   | M   | E   | V   | I   | I   | M | K  | E  | Y  | D   | R   | T   | H   | A   | A  |
|        | HuN4-F40   | -        | -   | -   | -   | -   | -   | I   | -   | - | K  | E  | -  | -   | -   | -   | -   | -   | -  |
|        | HuN4-F60   | -        | -   | -   | -   | -   | -   | I   | -   | - | K  | G  | -  | -   | -   | -   | -   | -   | -  |
|        | HuN4-F112  | -        | -   | -   | -   | -   | -   | L   | -   | - | R  | G  | -  | -   | -   | -   | -   | -   | -  |
| NT0801 | NT0801     | HQ315836 | -   | -   | -   | -   | -   | -   | -   | - | -  | -  | -  | -   | -   | -   | -   | -   | -  |
|        | NT0801-P10 | KJ523894 | -   | -   | -   | -   | -   | -   | -   | - | -  | -  | -  | -   | -   | -   | -   | -   | -  |
|        | NT0801-P30 | KJ523895 | -   | -   | -   | -   | -   | -   | -   | - | -  | -  | -  | -   | -   | -   | -   | -   | -  |
|        | NT0801-P50 | KJ523896 | -   | -   | -   | -   | -   | -   | -   | - | -  | -  | -  | -   | -   | -   | -   | -   | -  |
|        | NT0801-P80 | KJ523897 | -   | -   | -   | -   | -   | -   | -   | - | -  | -  | -  | -   | -   | -   | -   | -   | -  |
| JXA1   | JXA1       | EF112445 | -   | -   | I   | E   | -   | -   | -   | - | -  | -  | -  | -   | R   | -   | -   | A   | A  |
|        | JXA1 P10   | FJ548854 | -   | -   | M   | E   | -   | -   | -   | - | -  | -  | -  | -   | H   | -   | -   | T   | A  |
|        | JXA1 P15   | FJ548855 | -   | -   | M   | G   | -   | -   | -   | - | -  | -  | -  | -   | H   | -   | -   | T   | A  |
|        | JXA1 P45   | FJ548851 | -   | -   | M   | G   | -   | -   | -   | - | -  | -  | -  | -   | H   | -   | -   | T   | V  |
|        | JXA1 P70   | FJ548852 | -   | -   | M   | G   | -   | -   | -   | - | -  | -  | -  | -   | H   | -   | -   | T   | V  |
|        | JXA1 P80   | FJ548853 | -   | -   | M   | G   | -   | -   | -   | - | -  | -  | -  | -   | H   | -   | -   | T   | V  |
|        | JXA1 P100  | KC422725 | -   | -   | M   | G   | -   | -   | -   | - | -  | -  | -  | -   | H   | -   | -   | T   | V  |
|        | JXA1 P110  | KC422726 | -   | -   | M   | G   | -   | -   | -   | - | -  | -  | -  | -   | H   | -   | -   | T   | A  |
|        | JXA1 P120  | KC422727 | -   | -   | M   | G   | -   | -   | -   | - | -  | -  | -  | -   | H   | -   | -   | T   | A  |
|        | JXA1-P130  | KC422728 | -   | -   | M   | G   | -   | -   | -   | - | -  | -  | -  | -   | H   | -   | -   | T   | A  |
|        | JXA1-P140  | KC422729 | -   | -   | M   | G   | -   | -   | -   | - | -  | -  | -  | -   | H   | -   | -   | T   | A  |
|        | JXA1-P150  | KC422730 | -   | -   | M   | G   | -   | -   | -   | - | -  | -  | -  | -   | H   | -   | -   | T   | A  |
|        | JXA1-P160  | KC422731 | -   | -   | M   | G   | -   | -   | -   | - | -  | -  | -  | -   | H   | -   | -   | T   | A  |
|        | JXA1-P170  | JQ804986 | -   | -   | M   | G   | -   | -   | -   | - | -  | -  | -  | -   | H   | -   | -   | T   | A  |
| JX143  | JX143      | EU708726 | -   | -   | -   | -   | V   | -   | -   | - | -  | -  | Y  | D   | -   | T   | H   | -   | -  |
|        | JXM20      | GQ499193 | -   | -   | -   | -   | V   | -   | -   | - | -  | -  | Y  | D   | -   | T   | H   | -   | -  |
|        | JXM40      | GQ499194 | -   | -   | -   | -   | A   | -   | -   | - | -  | -  | C  | D   | -   | A   | L   | -   | -  |
|        | JXM60      | GQ499195 | -   | -   | -   | -   | V   | -   | -   | - | -  | -  | Y  | D   | -   | T   | H   | -   | -  |
|        | JXM80      | GQ499196 | -   | -   | -   | -   | V   | -   | -   | - | -  | -  | Y  | D   | -   | T   | H   | -   | -  |
|        | JXM100     | GQ475526 | -   | -   | -   | -   | V   | -   | -   | - | -  | -  | Y  | N   | -   | A   | H   | -   | -  |

|        |            |          |       |    |     |     |     |     |     |     |     |     |     |     |       |    |     |     |     |
|--------|------------|----------|-------|----|-----|-----|-----|-----|-----|-----|-----|-----|-----|-----|-------|----|-----|-----|-----|
| GD     | GD         | EU825724 | -     | -  | -   | -   | -   | -   | -   | -   | -   | -   | -   | -   | -     | -  | -   | -   | -   |
|        | GD-P100    | GU143913 | -     | -  | -   | -   | -   | -   | -   | -   | -   | -   | -   | -   | -     | -  | -   | -   | -   |
| GDQY1  | GDQY1      | JN387271 | -     | P  | -   | -   | -   | -   | I   | -   | -   | -   | -   | -   | -     | -  | -   | -   | -   |
|        | GDQY1VP65  | JN387272 | -     | S  | -   | -   | -   | -   | I   | -   | -   | -   | -   | -   | -     | -  | -   | -   | -   |
|        | GDQY1VP80  | JN387273 | -     | S  | -   | -   | -   | -   | M   | -   | -   | -   | -   | -   | -     | -  | -   | -   | -   |
|        | GDQY1VP100 | JN387274 | -     | S  | -   | -   | -   | -   | M   | -   | -   | -   | -   | -   | -     | -  | -   | -   | -   |
| BJ     | BJ         | EU825723 | L     | -  | -   | -   | -   | -   | -   | M   | -   | E   | -   | -   | -     | -  | -   | -   | -   |
|        | BJ-F20     | KP890337 | L     | -  | -   | -   | -   | -   | -   | M   | -   | E   | -   | -   | -     | -  | -   | -   | -   |
|        | BJ-F40     | KP890338 | L     | -  | -   | -   | -   | -   | -   | M   | -   | E   | -   | -   | -     | -  | -   | -   | -   |
|        | BJ-F80     | KP890340 | L     | -  | -   | -   | -   | -   | -   | M   | -   | E   | -   | -   | -     | -  | -   | -   | -   |
|        | BJ-F100    | KP890341 | F     | -  | -   | -   | -   | -   | -   | I   | -   | G   | -   | -   | -     | -  | -   | -   | -   |
|        | BJ-F150    | KP890342 | F     | -  | -   | -   | -   | -   | -   | I   | -   | G   | -   | -   | -     | -  | -   | -   | -   |
| TP     | TP         | EU864233 | -     | P  | -   | -   | -   | -   | -   | -   | -   | -   | -   | -   | -     | -  | -   | A   | -   |
|        | TP_P60     | GU232736 | -     | S  | -   | -   | -   | -   | -   | -   | -   | -   | -   | -   | -     | -  | -   | T   | -   |
|        | TP_P90     | GU232737 | -     | S  | -   | -   | -   | -   | -   | -   | -   | -   | -   | -   | -     | -  | -   | T   | -   |
| BB0907 | BB0907     | HQ315835 | -     | P  | -   | -   | -   | -   | -   | -   | -   | -   | -   | -   | -     | -  | -   | -   | -   |
|        | BB0907-s34 | KM453698 | -     | S  | -   | -   | -   | -   | -   | -   | -   | -   | -   | -   | -     | -  | -   | -   | -   |
|        | BB0907-F44 | KM453699 | -     | P  | -   | -   | -   | -   | -   | -   | -   | -   | -   | -   | -     | -  | -   | -   | -   |
| Series | Name       | NO.      | NSP11 |    |     |     |     |     |     |     |     |     |     |     | NSP12 |    |     |     |     |
|        |            |          | 89    | 97 | 103 | 125 | 145 | 158 | 175 | 191 | 195 | 197 | 202 | 215 | 216   | 43 | 118 | 121 | 134 |
|        | VR2332     | EF536003 | K     | V  | F   | A   | H   | E   | L   | H   | Q   | K   | M   | D   | K     | T  | D   | R   | T   |
| HuN4   | HuN4       | EF635006 | K     | V  | F   | E   | H   | E   | V   | H   | P   | K   | T   | G   | R     | T  | D   | R   | T   |
|        | HuN4-F40   | -        | -     | M  | F   | -   | -   | -   | -   | Y   | Q   | R   | M   | D   | K     | -  | -   | -   | I   |
|        | HuN4-F60   | -        | -     | M  | L   | -   | -   | -   | -   | Y   | Q   | R   | M   | D   | K     | -  | -   | -   | I   |
|        | HuN4-F112  | -        | -     | M  | F   | -   | -   | -   | -   | Y   | Q   | R   | M   | D   | K     | -  | -   | -   | I   |
| NT0801 | NT0801     | HQ315836 | -     | -  | -   | -   | -   | -   | -   | -   | Q   | R   | M   | -   | K     | -  | -   | -   | -   |
|        | NT0801-P10 | KJ523894 | -     | -  | -   | -   | -   | -   | -   | -   | Q   | R   | M   | -   | K     | -  | -   | -   | -   |
|        | NT0801-P30 | KJ523895 | -     | -  | -   | -   | -   | -   | -   | -   | Q   | R   | M   | -   | K     | -  | -   | -   | -   |
|        | NT0801-P50 | KJ523896 | -     | -  | -   | -   | -   | -   | -   | -   | Q   | R   | M   | -   | K     | -  | -   | -   | -   |
|        | NT0801-P80 | KJ523897 | -     | -  | -   | -   | -   | -   | -   | -   | Q   | R   | M   | -   | K     | -  | -   | -   | -   |
| JXA1   | JXA1       | EF112445 | -     | M  | -   | -   | -   | -   | -   | -   | Q   | R   | M   | D   | K     | -  | -   | -   | -   |

|       |            |          |   |   |   |   |   |   |   |   |   |   |   |   |   |   |   |   |   |
|-------|------------|----------|---|---|---|---|---|---|---|---|---|---|---|---|---|---|---|---|---|
|       | JXA1 P10   | FJ548854 | - | V | - | - | - | - | - | - | Q | R | M | D | K | - | - | - | - |
|       | JXA1 P15   | FJ548855 | - | V | - | - | - | - | - | - | Q | R | M | D | K | - | - | - | - |
|       | JXA1 P45   | FJ548851 | - | V | - | - | - | - | - | - | Q | R | M | D | K | - | - | - | - |
|       | JXA1 P70   | FJ548852 | - | V | - | - | - | - | - | - | Q | R | M | D | K | - | - | - | - |
|       | JXA1 P80   | FJ548853 | - | V | - | - | - | - | - | - | Q | R | M | D | K | - | - | - | - |
|       | JXA1 P100  | KC422725 | - | V | - | - | - | - | - | - | Q | R | M | D | K | - | - | - | - |
|       | JXA1 P110  | KC422726 | - | V | - | - | - | - | - | - | Q | R | M | D | K | - | - | - | - |
|       | JXA1 P120  | KC422727 | - | V | - | - | - | - | - | - | Q | R | M | D | K | - | - | - | - |
|       | JXA1-P130  | KC422728 | - | V | - | - | - | - | - | - | Q | R | M | D | K | - | - | - | - |
|       | JXA1-P140  | KC422729 | - | V | - | - | - | - | - | - | Q | R | M | D | K | - | - | - | - |
|       | JXA1-P150  | KC422730 | - | V | - | - | - | - | - | - | Q | R | M | D | K | - | - | - | - |
|       | JXA1-P160  | KC422731 | - | V | - | - | - | - | - | - | Q | R | M | D | K | - | - | - | - |
|       | JXA1-P170  | JQ804986 | - | V | - | - | - | - | - | - | Q | R | M | D | K | T | - | - | - |
| JX143 | JX143      | EU708726 | - | - | - | E | - | - | - | - | Q | R | M | D | K | T | - | - | - |
|       | JXM20      | GQ499193 | - | - | - | K | - | - | - | - | Q | R | M | D | K | T | - | - | - |
|       | JXM40      | GQ499194 | - | - | - | K | - | - | - | - | Q | R | M | D | K | T | - | - | - |
|       | JXM60      | GQ499195 | - | - | - | E | - | - | - | - | Q | R | M | D | K | T | - | - | - |
|       | JXM80      | GQ499196 | - | - | - | E | - | - | - | - | Q | R | M | D | K | T | - | - | - |
|       | JXM100     | GQ475526 | - | - | - | K | - | - | - | - | Q | R | M | D | K | A | - | - | - |
| GD    | GD         | EU825724 | - | - | - | - | - | - | - | - | Q | R | M | D | K | - | - | R | - |
|       | GD-P100    | GU143913 | - | - | - | - | - | - | - | - | Q | R | M | D | K | - | - | W | - |
| GDQY1 | GDQY1      | JN387271 | - | - | - | - | - | - | - | - | Q | R | M | D | K | - | - | - | - |
|       | GDQY1VP65  | JN387272 | - | - | - | - | - | - | - | - | Q | R | M | D | K | - | - | - | - |
|       | GDQY1VP80  | JN387273 | - | - | - | - | - | - | - | - | Q | R | M | D | K | - | - | - | - |
|       | GDQY1VP100 | JN387274 | - | - | - | - | - | - | - | - | Q | R | M | D | K | - | - | - | - |
| BJ    | BJ         | EU825723 | - | - | - | - | - | - | - | - | Q | R | M | D | K | - | - | - | - |
|       | BJ-F20     | KP890337 | - | - | - | - | - | - | - | - | Q | R | M | D | K | - | - | - | - |
|       | BJ-F40     | KP890338 | - | - | - | - | - | - | - | - | Q | R | M | D | K | - | - | - | - |
|       | BJ-F80     | KP890340 | - | - | - | - | - | - | - | - | Q | R | M | D | K | - | - | - | - |
|       | BJ-F100    | KP890341 | - | - | - | - | - | - | - | - | Q | R | M | D | K | - | - | - | - |
|       | BJ-F150    | KP890342 | - | - | - | - | - | - | - | - | Q | R | M | D | K | - | - | - | - |



|        |            |          |     |     |     |     |     |     |     |     |     |     |     |   |   |    |    |    |     |
|--------|------------|----------|-----|-----|-----|-----|-----|-----|-----|-----|-----|-----|-----|---|---|----|----|----|-----|
| TP     | TP         | EU864233 | K   | -   | -   | -   | H   | -   | -   | -   | Q   | R   | M   | D | K | -  | -  | -  | -   |
|        | TP_P60     | GU232736 | K   | -   | -   | -   | R   | -   | -   | -   | Q   | R   | M   | D | K | -  | -  | -  | -   |
|        | TP_P90     | GU232737 | I   | -   | -   | -   | H   | -   | -   | -   | Q   | R   | M   | D | K | -  | -  | -  | -   |
| BB0907 | BB0907     | HQ315835 | -   | -   | -   | -   | -   | E   | I   | -   | Q   | R   | M   | D | K | -  | D  | -  | -   |
|        | BB0907-s34 | KM453698 | -   | -   | -   | -   | -   | E   | V   | -   | Q   | R   | M   | D | K | -  | V  | -  | -   |
|        | BB0907-F44 | KM453699 | -   | -   | -   | -   | -   | K   | V   | -   | Q   | R   | M   | D | K | -  | D  | -  | -   |
| Series | Name       | NO.      | GP2 |     |     |     |     |     |     |     |     |     |     | E |   |    |    |    | GP3 |
|        |            |          | 50  | 118 | 132 | 168 | 177 | 198 | 204 | 221 | 239 | 250 | 251 | 3 | 9 | 40 | 48 | 62 |     |
|        | VR2332     | EF536003 | F   | I   | S   | M   | S   | G   | H   | V   | R   | I   | F   | S | D | T  | F  | P  | C   |
| HuN4   | HuN4       | EF635006 | Y   | I   | S   | M   | S   | G   | H   | V   | R   | T   | F   | S | D | T  | L  | P  | R   |
|        | HuN4-F40   | -        | Y   | I   | -   | -   | S   | -   | -   | -   | -   | T   | -   | - | D | -  | L  | S  | -   |
|        | HuN4-F60   | -        | Y   | I   | -   | -   | S   | -   | -   | -   | -   | T   | -   | - | D | -  | L  | S  | -   |
|        | HuN4-F112  | -        | S   | V   | -   | -   | A   | -   | -   | -   | -   | I   | -   | - | N | -  | F  | S  | -   |
| NT0801 | NT0801     | HQ315836 | S   | I   | -   | -   | -   | -   | -   | -   | -   | -   | -   | - | D | -  | -  | -  | -   |
|        | NT0801-P10 | KJ523894 | S   | I   | -   | -   | -   | -   | -   | -   | -   | -   | -   | - | D | -  | -  | -  | -   |
|        | NT0801-P30 | KJ523895 | S   | V   | -   | -   | -   | -   | -   | -   | -   | -   | -   | - | D | -  | -  | -  | -   |
|        | NT0801-P50 | KJ523896 | S   | V   | -   | -   | -   | -   | -   | -   | -   | -   | -   | - | Y | -  | -  | -  | -   |
|        | NT0801-P80 | KJ523897 | S   | V   | -   | -   | -   | -   | -   | -   | -   | -   | -   | - | Y | -  | -  | -  | -   |
| JXA1   | JXA1       | EF112445 | Y   | I   | -   | M   | -   | -   | H   | -   | -   | -   | F   | S | D | -  | L  | -  | -   |
|        | JXA1 P10   | FJ548854 | Y   | I   | -   | M   | -   | -   | H   | -   | -   | -   | F   | S | D | -  | L  | -  | -   |
|        | JXA1 P15   | FJ548855 | Y   | I   | -   | M   | -   | -   | H   | -   | -   | -   | S   | S | D | -  | L  | -  | -   |
|        | JXA1 P45   | FJ548851 | F   | I   | -   | T   | -   | -   | H   | -   | -   | -   | S   | S | H | -  | F  | -  | -   |
|        | JXA1 P70   | FJ548852 | F   | I   | -   | T   | -   | -   | H   | -   | -   | -   | S   | S | H | -  | F  | -  | -   |
|        | JXA1 P80   | FJ548853 | F   | V   | -   | T   | -   | -   | H   | -   | -   | -   | S   | S | H | -  | F  | -  | -   |
|        | JXA1 P100  | KC422725 | F   | V   | -   | T   | -   | -   | H   | -   | -   | -   | S   | S | H | -  | F  | -  | -   |
|        | JXA1 P110  | KC422726 | F   | V   | -   | M   | -   | -   | N   | -   | -   | -   | S   | A | H | -  | F  | -  | -   |
|        | JXA1 P120  | KC422727 | F   | V   | -   | M   | -   | -   | N   | -   | -   | -   | S   | S | H | -  | F  | -  | -   |
|        | JXA1-P130  | KC422728 | F   | V   | -   | M   | -   | -   | N   | -   | -   | -   | S   | A | H | -  | F  | -  | -   |
|        | JXA1-P140  | KC422729 | F   | V   | -   | M   | -   | -   | N   | -   | -   | -   | S   | A | H | -  | F  | -  | -   |
|        | JXA1-P150  | KC422730 | F   | V   | -   | M   | -   | -   | N   | -   | -   | -   | S   | A | H | -  | F  | -  | -   |
|        | JXA1-P160  | KC422731 | F   | V   | -   | M   | -   | -   | N   | -   | -   | -   | S   | A | H | -  | F  | -  | -   |

|        |            |          |     |    |    |    |    |    |     |     |     |     |     |     |     |     |     |     |     |
|--------|------------|----------|-----|----|----|----|----|----|-----|-----|-----|-----|-----|-----|-----|-----|-----|-----|-----|
|        | JXA1-P170  | JQ804986 | F   | V  | -  | M  | -  | -  | N   | -   | -   | -   | S   | A   | H   | -   | F   | -   | -   |
| JX143  | JX143      | EU708726 | -   | -  | -  | -  | -  | -  | -   | -   | R   | -   | -   | -   | -   | -   | -   | -   | -   |
|        | JXM20      | GQ499193 | -   | -  | -  | -  | -  | -  | -   | -   | S   | -   | -   | -   | -   | -   | -   | -   | -   |
|        | JXM40      | GQ499194 | -   | -  | -  | -  | -  | -  | -   | -   | S   | -   | -   | -   | -   | -   | -   | -   | -   |
|        | JXM60      | GQ499195 | -   | -  | -  | -  | -  | -  | -   | -   | S   | -   | -   | -   | -   | -   | -   | -   | -   |
|        | JXM80      | GQ499196 | -   | -  | -  | -  | -  | -  | -   | -   | R   | -   | -   | -   | -   | -   | -   | -   | -   |
|        | JXM100     | GQ475526 | -   | -  | -  | -  | -  | -  | -   | -   | S   | -   | -   | -   | -   | -   | -   | -   | -   |
| GD     | GD         | EU825724 | -   | -  | -  | -  | -  | -  | -   | -   | -   | -   | -   | -   | D   | -   | -   | -   | -   |
|        | GD-P100    | GU143913 | -   | -  | -  | -  | -  | -  | -   | -   | -   | -   | -   | -   | N   | -   | -   | -   | -   |
| GDQY1  | GDQY1      | JN387271 | Y   | I  | S  | -  | -  | -  | H   | -   | -   | -   | -   | -   | D   | -   | L   | -   | -   |
|        | GDQY1VP65  | JN387272 | Y   | I  | S  | -  | -  | -  | H   | -   | -   | -   | -   | -   | N   | -   | L   | -   | -   |
|        | GDQY1VP80  | JN387273 | F   | V  | N  | -  | -  | -  | N   | -   | -   | -   | -   | -   | N   | -   | F   | -   | -   |
|        | GDQY1VP100 | JN387274 | F   | V  | N  | -  | -  | -  | N   | -   | -   | -   | -   | -   | N   | -   | F   | -   | -   |
| BJ     | BJ         | EU825723 | Y   | I  | S  | -  | -  | -  | -   | -   | -   | -   | -   | -   | D   | -   | L   | -   | -   |
|        | BJ-F20     | KP890337 | Y   | T  | S  | -  | -  | -  | -   | -   | -   | -   | -   | -   | D   | -   | L   | -   | -   |
|        | BJ-F40     | KP890338 | Y   | T  | S  | -  | -  | -  | -   | -   | -   | -   | -   | -   | D   | -   | L   | -   | -   |
|        | BJ-F80     | KP890340 | F   | T  | N  | -  | -  | -  | -   | -   | -   | -   | -   | -   | N   | -   | F   | -   | -   |
|        | BJ-F100    | KP890341 | F   | T  | S  | -  | -  | -  | -   | -   | -   | -   | -   | -   | N   | -   | F   | -   | -   |
|        | BJ-F150    | KP890342 | F   | T  | N  | -  | -  | -  | -   | -   | -   | -   | -   | -   | N   | -   | F   | -   | -   |
| TP     | TP         | EU864233 | Y   | I  | -  | -  | -  | -  | -   | V   | -   | T   | -   | -   | D   | T   | L   | -   | R   |
|        | TP_P60     | GU232736 | F   | V  | -  | -  | -  | -  | -   | I   | -   | I   | -   | -   | H   | S   | F   | -   | H   |
|        | TP_P90     | GU232737 | F   | V  | -  | -  | -  | -  | -   | I   | -   | I   | -   | -   | H   | S   | F   | -   | H   |
| BB0907 | BB0907     | HQ315835 | -   | -  | -  | -  | -  | G  | -   | -   | -   | -   | -   | -   | D   | -   | -   | -   | -   |
|        | BB0907-s34 | KM453698 | -   | -  | -  | -  | -  | V  | -   | -   | -   | -   | -   | -   | D   | -   | -   | -   | -   |
|        | BB0907-F44 | KM453699 | -   | -  | -  | -  | -  | G  | -   | -   | -   | -   | -   | -   | N   | -   | -   | -   | -   |
| Series | Name       | NO.      | GP3 |    |    |    |    |    |     |     |     |     |     |     |     |     |     |     |     |
|        |            |          | 31  | 48 | 69 | 71 | 73 | 79 | 111 | 134 | 143 | 165 | 206 | 215 | 216 | 217 | 225 | 226 | 228 |
|        | VR2332     | EF536003 | T   | T  | P  | R  | L  | Y  | L   | R   | L   | F   | N   | I   | L   | R   | A   | L   | S   |
| HuN4   | HuN4       | EF635006 | T   | M  | P  | K  | L  | H  | L   | Q   | F   | F   | N   | T   | S   | K   | T   | S   | S   |
|        | HuN4-F40   | -        | -   | V  | -  | -  | F  | -  | -   | -   | -   | -   | S   | -   | -   | -   | -   | -   | -   |
|        | HuN4-F60   | -        | -   | V  | -  | -  | F  | -  | -   | -   | -   | -   | S   | -   | -   | -   | -   | -   | -   |

|        |            |          |   |   |   |   |   |   |   |   |   |   |   |   |   |   |   |   |   |
|--------|------------|----------|---|---|---|---|---|---|---|---|---|---|---|---|---|---|---|---|---|
|        | HuN4-F112  | -        | - | V | - | - | F | - | - | - | - | - | S | - | - | - | - | - | - |
| NT0801 | NT0801     | HQ315836 | - | - | - | - | F | - | - | - | S | - | S | - | - | - | - | - | - |
|        | NT0801-P10 | KJ523894 | - | - | - | - | F | - | - | - | S | - | S | - | - | - | - | - | - |
|        | NT0801-P30 | KJ523895 | - | - | - | - | F | - | - | - | S | - | S | - | - | - | - | - | - |
|        | NT0801-P50 | KJ523896 | - | - | - | - | F | - | - | - | L | - | S | - | - | - | - | - | - |
|        | NT0801-P80 | KJ523897 | - | - | - | - | F | - | - | - | L | - | S | - | - | - | - | - | - |
| JXA1   | JXA1       | EF112445 | - | - | - | - | F | H | - | - | F | F | S | - | L | - | T | S | - |
|        | JXA1 P10   | FJ548854 | - | - | - | - | F | H | - | - | F | F | S | - | L | - | T | S | - |
|        | JXA1 P15   | FJ548855 | - | - | - | - | F | H | - | - | F | F | S | - | L | - | A | S | - |
|        | JXA1 P45   | FJ548851 | - | - | - | - | F | H | - | - | F | F | S | - | L | - | A | S | - |
|        | JXA1 P70   | FJ548852 | - | - | - | - | F | N | - | - | F | F | S | - | L | - | A | L | - |
|        | JXA1 P80   | FJ548853 | - | - | - | - | F | N | - | - | F | F | S | - | L | - | A | L | - |
|        | JXA1 P100  | KC422725 | - | - | - | - | F | N | - | - | F | F | S | - | L | - | A | S | - |
|        | JXA1 P110  | KC422726 | - | - | - | - | F | N | - | - | F | F | S | - | L | - | A | S | - |
|        | JXA1 P120  | KC422727 | - | - | - | - | F | H | - | - | Y | F | S | - | L | - | A | S | - |
|        | JXA1-P130  | KC422728 | - | - | - | - | F | Y | - | - | F | F | S | - | L | - | A | L | - |
|        | JXA1-P140  | KC422729 | - | - | - | - | F | Y | - | - | F | F | S | - | L | - | A | S | - |
|        | JXA1-P150  | KC422730 | - | - | - | - | F | N | - | - | F | F | S | - | L | - | A | L | - |
|        | JXA1-P160  | KC422731 | - | - | - | - | F | Y | - | - | F | Y | S | - | L | - | A | S | - |
|        | JXA1-P170  | JQ804986 | - | - | - | - | F | Y | - | - | F | Y | S | - | S | - | A | L | - |
| JX143  | JX143      | EU708726 | T | - | - | - | F | H | L | - | F | - | S | - | - | - | T | - | - |
|        | JXM20      | GQ499193 | K | - | - | - | F | H | L | - | F | - | S | - | - | - | A | - | - |
|        | JXM40      | GQ499194 | K | - | - | - | F | H | L | - | F | - | S | - | - | - | A | - | - |
|        | JXM60      | GQ499195 | K | - | - | - | F | Y | L | - | L | - | S | - | - | - | A | - | - |
|        | JXM80      | GQ499196 | T | - | - | - | F | Y | L | - | F | - | S | - | - | - | A | - | - |
|        | JXM100     | GQ475526 | K | - | - | - | F | Y | S | - | L | - | S | - | - | - | A | - | - |
| GD     | GD         | EU825724 | - | - | - | - | F | - | - | - | - | - | S | - | - | - | - | S | - |
|        | GD-P100    | GU143913 | - | - | - | - | F | - | - | - | - | - | S | - | - | - | - | L | - |
| GDQY1  | GDQY1      | JN387271 | - | - | - | - | F | H | - | - | F | - | S | T | - | - | - | - | - |
|        | GDQY1VP65  | JN387272 | - | - | - | - | F | Y | - | - | L | - | S | I | - | - | - | - | - |
|        | GDQY1VP80  | JN387273 | - | - | - | - | F | Y | - | - | L | - | S | T | - | - | - | - | - |

|        | GDQY1VP100 | JN387274 | -   | -   | -   | -   | F  | Y  | -  | -  | L  | -  | S  | T   | -   | -   | -   | -   | -   |
|--------|------------|----------|-----|-----|-----|-----|----|----|----|----|----|----|----|-----|-----|-----|-----|-----|-----|
| BJ     | BJ         | EU825723 | -   | -   | -   | -   | F  | -  | -  | Q  | -  | -  | S  | -   | -   | -   | T   | -   | -   |
|        | BJ-F20     | KP890337 | -   | -   | -   | -   | F  | -  | -  | Q  | -  | -  | S  | -   | -   | -   | A   | -   | -   |
|        | BJ-F40     | KP890338 | -   | -   | -   | -   | F  | -  | -  | Q  | -  | -  | S  | -   | -   | -   | A   | -   | -   |
|        | BJ-F80     | KP890340 | -   | -   | -   | -   | F  | -  | -  | R  | -  | -  | S  | -   | -   | -   | A   | -   | -   |
|        | BJ-F100    | KP890341 | -   | -   | -   | -   | F  | -  | -  | R  | -  | -  | S  | -   | -   | -   | A   | -   | -   |
|        | BJ-F150    | KP890342 | -   | -   | -   | -   | F  | -  | -  | R  | -  | -  | S  | -   | -   | -   | A   | -   | -   |
| TP     | TP         | EU864233 | -   | -   | -   | -   | F  | -  | -  | -  | F  | -  | S  | -   | -   | K   | T   | -   | F   |
|        | TP_P60     | GU232736 | -   | -   | -   | -   | F  | -  | -  | -  | S  | -  | S  | -   | -   | K   | A   | -   | F   |
|        | TP_P90     | GU232737 | -   | -   | -   | -   | F  | -  | -  | -  | S  | -  | S  | -   | -   | R   | A   | -   | S   |
| BB0907 | BB0907     | HQ315835 | -   | -   | P   | K   | F  | H  | -  | -  | -  | -  | S  | -   | L   | -   | -   | S   | -   |
|        | BB0907-s34 | KM453698 | -   | -   | S   | R   | F  | H  | -  | -  | -  | -  | S  | -   | L   | -   | -   | P   | -   |
|        | BB0907-F44 | KM453699 | -   | -   | P   | K   | F  | Y  | -  | -  | -  | -  | S  | -   | L   | -   | -   | S   | -   |
| Series | Name       | NO.      | GP3 |     |     | GP4 |    |    |    |    |    |    |    |     |     |     |     |     |     |
|        |            |          | 238 | 244 | 248 | 14  | 42 | 43 | 44 | 51 | 56 | 66 | 67 | 124 | 129 | 132 | 141 | 160 | 172 |
|        | VR2332     | EF536003 | A   | R   | S   | C   | A  | S  | F  | S  | R  | I  | P  | I   | V   | T   | F   | E   | F   |
| HuN4   | HuN4       | EF635006 | A   | R   | V   | C   | S  | N  | F  | S  | G  | S  | S  | I   | V   | T   | F   | E   | F   |
|        | HuN4-F40   | -        | -   | -   | F   | -   | -  | D  | -  | -  | -  | I  | P  | V   | I   | -   | -   | E   | -   |
|        | HuN4-F60   | -        | -   | -   | F   | -   | -  | D  | -  | -  | -  | I  | P  | V   | I   | -   | -   | E   | -   |
|        | HuN4-F112  | -        | -   | -   | F   | -   | -  | N  | -  | -  | -  | I  | P  | V   | I   | -   | -   | G   | -   |
| NT0801 | NT0801     | HQ315836 | -   | -   | -   | -   | -  | G  | -  | -  | -  | -  | -  | -   | -   | -   | -   | -   | -   |
|        | NT0801-P10 | KJ523894 | -   | -   | -   | -   | -  | G  | -  | -  | -  | -  | -  | -   | -   | -   | -   | -   | -   |
|        | NT0801-P30 | KJ523895 | -   | -   | -   | -   | -  | G  | -  | -  | -  | -  | -  | -   | -   | -   | -   | -   | -   |
|        | NT0801-P50 | KJ523896 | -   | -   | -   | -   | -  | G  | -  | -  | -  | -  | -  | -   | -   | -   | -   | -   | -   |
|        | NT0801-P80 | KJ523897 | -   | -   | -   | -   | -  | G  | -  | -  | -  | -  | -  | -   | -   | -   | -   | -   | -   |
| JXA1   | JXA1       | EF112445 | -   | R   | F   | C   | -  | D  | -  | -  | -  | I  | S  | I   | -   | S   | -   | -   | L   |
|        | JXA1 P10   | FJ548854 | -   | R   | F   | C   | -  | D  | -  | -  | -  | I  | S  | I   | -   | S   | -   | -   | F   |
|        | JXA1 P15   | FJ548855 | -   | R   | V   | C   | -  | G  | -  | -  | -  | S  | S  | I   | -   | T   | -   | -   | F   |
|        | JXA1 P45   | FJ548851 | -   | R   | V   | C   | -  | G  | -  | -  | -  | S  | S  | I   | -   | T   | -   | -   | V   |
|        | JXA1 P70   | FJ548852 | -   | R   | V   | C   | -  | G  | -  | -  | -  | S  | P  | I   | -   | T   | -   | -   | V   |
|        | JXA1 P80   | FJ548853 | -   | R   | V   | C   | -  | G  | -  | -  | -  | S  | S  | I   | -   | T   | -   | -   | V   |

[illegible]

[illegible]

|        |            |          |     |     |     |     |     |     |     |    |    |     |     |     |     |     |    |      |    |
|--------|------------|----------|-----|-----|-----|-----|-----|-----|-----|----|----|-----|-----|-----|-----|-----|----|------|----|
|        | JXM80      | GQ499196 | -   | -   | -   | -   | -   | -   | -   | -  | -  | -   | -   | -   | -   | -   | -  | -    | -  |
|        | JXM100     | GQ475526 | -   | -   | -   | -   | -   | -   | -   | -  | -  | -   | -   | -   | -   | -   | -  | -    | -  |
| GD     | GD         | EU825724 | -   | -   | -   | -   | -   | -   | -   | -  | -  | -   | -   | -   | -   | -   | -  | -    | -  |
|        | GD-P100    | GU143913 | -   | -   | -   | -   | -   | -   | -   | -  | -  | -   | -   | -   | -   | -   | -  | -    | -  |
| GDQY1  | GDQY1      | JN387271 | -   | -   | -   | Y   | -   | -   | -   | -  | -  | -   | G   | W   | L   | -   | G  | -    | -  |
|        | GDQY1VP65  | JN387272 | -   | -   | -   | N   | -   | -   | -   | -  | -  | -   | G   | W   | L   | -   | V  | -    | -  |
|        | GDQY1VP80  | JN387273 | -   | -   | -   | Y   | -   | -   | -   | -  | -  | -   | G   | F   | L   | -   | G  | -    | -  |
|        | GDQY1VP100 | JN387274 | -   | -   | -   | Y   | -   | -   | -   | -  | -  | -   | V   | W   | P   | -   | V  | -    | -  |
| BJ     | BJ         | EU825723 | -   | -   | -   | -   | Y   | -   | -   | -  | -  | -   | -   | -   | -   | -   | -  | -    | -  |
|        | BJ-F20     | KP890337 | -   | -   | -   | -   | Y   | -   | -   | -  | -  | -   | -   | -   | -   | -   | -  | -    | -  |
|        | BJ-F40     | KP890338 | -   | -   | -   | -   | C   | -   | -   | -  | -  | -   | -   | -   | -   | -   | -  | -    | -  |
|        | BJ-F80     | KP890340 | -   | -   | -   | -   | C   | -   | -   | -  | -  | -   | -   | -   | -   | -   | -  | -    | -  |
|        | BJ-F100    | KP890341 | -   | -   | -   | -   | C   | -   | -   | -  | -  | -   | -   | -   | -   | -   | -  | -    | -  |
|        | BJ-F150    | KP890342 | -   | -   | -   | -   | C   | -   | -   | -  | -  | -   | -   | -   | -   | -   | -  | -    | -  |
| TP     | TP         | EU864233 | -   | -   | -   | -   | -   | -   | -   | -  | -  | -   | -   | -   | -   | -   | -  | -    | -  |
|        | TP_P60     | GU232736 | -   | -   | -   | -   | -   | -   | -   | -  | -  | -   | -   | -   | -   | -   | -  | -    | -  |
|        | TP_P90     | GU232737 | -   | -   | -   | -   | -   | -   | -   | -  | -  | -   | -   | -   | -   | -   | -  | -    | -  |
| BB0907 | BB0907     | HQ315835 | -   | -   | -   | -   | -   | -   | -   | -  | N  | -   | -   | -   | -   | -   | -  | -    | Y  |
|        | BB0907-s34 | KM453698 | -   | -   | -   | -   | -   | -   | -   | -  | N  | -   | -   | -   | -   | -   | -  | -    | C  |
|        | BB0907-F44 | KM453699 | -   | -   | -   | -   | -   | -   | -   | -  | D  | -   | -   | -   | -   | -   | -  | -    | Y  |
| Series | Name       | NO.      | GP5 |     |     |     |     |     |     | M  |    |     |     |     |     |     | N  | 3UTR |    |
|        |            |          | 104 | 134 | 159 | 164 | 170 | 173 | 196 | 63 | 93 | 107 | 128 | 129 | 146 | 164 | 11 | 3    | 36 |
|        | VR2332     | EF536003 | G   | W   | V   | R   | E   | L   | Q   | A  | K  | K   | N   | D   | T   | Q   | R  | C    | T  |
| HuN4   | HuN4       | EF635006 | G   | W   | V   | G   | K   | L   | Q   | V  | K  | R   | N   | D   | T   | Q   | R  | T    | T  |
|        | HuN4-F40   | -        | -   | -   | -   | -   | E   | -   | R   | V  | -  | K   | -   | -   | -   | -   | K  | C    | -  |
|        | HuN4-F60   | -        | -   | -   | -   | -   | E   | -   | R   | A  | -  | K   | -   | -   | -   | -   | K  | C    | -  |
|        | HuN4-F112  | -        | -   | -   | -   | -   | E   | -   | R   | A  | -  | K   | -   | -   | -   | -   | K  | C    | -  |
| NT0801 | NT0801     | HQ315836 | -   | -   | -   | -   | G   | -   | -   | -  | -  | K   | -   | -   | -   | -   | K  | C    | -  |
|        | NT0801-P10 | KJ523894 | -   | -   | -   | -   | G   | -   | -   | -  | -  | K   | -   | -   | -   | -   | K  | C    | -  |
|        | NT0801-P30 | KJ523895 | -   | -   | -   | -   | G   | -   | -   | -  | -  | K   | -   | -   | -   | -   | K  | C    | -  |
|        | NT0801-P50 | KJ523896 | -   | -   | -   | -   | R   | -   | -   | -  | -  | K   | -   | -   | -   | -   | K  | C    | -  |

|       |            |          |   |   |   |   |   |   |   |   |   |   |   |   |   |   |   |   |   |
|-------|------------|----------|---|---|---|---|---|---|---|---|---|---|---|---|---|---|---|---|---|
|       | NT0801-P80 | KJ523897 | - | - | - | - | R | - | - | - | - | K | - | - | - | - | K | C | - |
| JXA1  | JXA1       | EF112445 | - | - | - | G | - | - | L | - | - | K | - | - | T | - | K | C | - |
|       | JXA1 P10   | FJ548854 | - | - | - | G | - | - | Q | - | - | K | - | - | T | - | K | C | - |
|       | JXA1 P15   | FJ548855 | - | - | - | G | - | - | Q | - | - | K | - | - | T | - | K | C | - |
|       | JXA1 P45   | FJ548851 | - | - | - | R | - | - | L | - | - | K | - | - | T | - | K | C | - |
|       | JXA1 P70   | FJ548852 | - | - | - | R | - | - | L | - | - | K | - | - | T | - | K | C | - |
|       | JXA1 P80   | FJ548853 | - | - | - | R | - | - | L | - | - | K | - | - | A | - | K | C | - |
|       | JXA1 P100  | KC422725 | - | - | - | R | - | - | L | - | - | K | - | - | T | - | K | C | - |
|       | JXA1 P110  | KC422726 | - | - | - | R | - | - | L | - | - | K | - | - | T | - | K | C | - |
|       | JXA1 P120  | KC422727 | - | - | - | R | - | - | L | - | - | K | - | - | T | - | K | C | - |
|       | JXA1-P130  | KC422728 | - | - | - | R | - | - | L | - | - | K | - | - | T | - | K | C | - |
|       | JXA1-P140  | KC422729 | - | - | - | R | - | - | L | - | - | K | - | - | T | - | K | C | - |
|       | JXA1-P150  | KC422730 | - | - | - | R | - | - | L | - | - | K | - | - | T | - | N | C | - |
|       | JXA1-P160  | KC422731 | - | - | - | R | - | - | L | - | - | K | - | - | T | - | N | C | - |
|       | JXA1-P170  | JQ804986 | - | - | - | R | - | - | L | - | - | K | - | - | T | - | N | C | - |
| JX143 | JX143      | EU708726 | - | - | - | - | - | - | - | - | - | K | - | - | - | Q | K | C | - |
|       | JXM20      | GQ499193 | - | - | - | - | - | - | - | - | - | K | - | - | - | Q | K | C | - |
|       | JXM40      | GQ499194 | - | - | - | - | - | - | - | - | - | K | - | - | - | Q | K | C | - |
|       | JXM60      | GQ499195 | - | - | - | - | - | - | - | - | - | K | - | - | - | R | K | C | - |
|       | JXM80      | GQ499196 | - | - | - | - | - | - | - | - | - | K | - | - | - | R | K | C | - |
|       | JXM100     | GQ475526 | - | - | - | - | - | - | - | - | - | K | - | - | - | R | K | C | - |
| GD    | GD         | EU825724 | - | - | - | - | - | - | Q | - | K | K | - | - | - | - | K | C | - |
|       | GD-P100    | GU143913 | - | - | - | - | - | - | R | - | R | K | - | - | - | - | K | C | - |
| GDQY1 | GDQY1      | JN387271 | - | - | - | - | - | - | Q | - | - | K | - | - | - | - | K | C | - |
|       | GDQY1VP65  | JN387272 | - | - | - | - | - | - | R | - | - | K | - | - | - | - | K | C | - |
|       | GDQY1VP80  | JN387273 | - | - | - | - | - | - | R | - | - | K | - | - | - | - | K | C | - |
|       | GDQY1VP100 | JN387274 | - | - | - | - | - | - | R | - | - | K | - | - | - | - | K | C | - |
| BJ    | BJ         | EU825723 | - | - | V | - | - | - | Q | - | - | K | N | D | - | - | K | C | - |
|       | BJ-F20     | KP890337 | - | - | V | - | - | - | R | - | - | K | N | D | - | - | K | C | - |
|       | BJ-F40     | KP890338 | - | - | V | - | - | - | R | - | - | K | N | D | - | - | K | C | - |
|       | BJ-F80     | KP890340 | - | - | I | - | - | - | R | - | - | K | N | D | - | - | K | C | - |



|        |            |          |      |    |    |    |     |     |     |     |     |     |   |   |   |   |   |   |   |
|--------|------------|----------|------|----|----|----|-----|-----|-----|-----|-----|-----|---|---|---|---|---|---|---|
|        | BJ-F100    | KP890341 | -    | -  | V  | -  | -   | -   | R   | -   | -   | K   | T | H | - | - | K | C | - |
|        | BJ-F150    | KP890342 | -    | -  | V  | -  | -   | -   | R   | -   | -   | K   | T | H | - | - | K | C | - |
| TP     | TP         | EU864233 | -    | W  | -  | -  | -   | L   | -   | V   | -   | K   | - | - | - | - | K | C | C |
|        | TP_P60     | GU232736 | -    | W  | -  | -  | -   | R   | -   | V   | -   | K   | - | - | - | - | K | C | T |
|        | TP_P90     | GU232737 | -    | R  | -  | -  | -   | R   | -   | A   | -   | K   | - | - | - | - | K | C | T |
| BB0907 | BB0907     | HQ315835 | G    | -  | -  | -  | -   | -   | -   | -   | -   | K   | - | - | - | - | K | T | - |
|        | BB0907-s34 | KM453698 | R    | -  | -  | -  | -   | -   | -   | -   | -   | K   | - | - | - | - | K | T | - |
|        | BB0907-F44 | KM453699 | G    | -  | -  | -  | -   | -   | -   | -   | -   | K   | - | - | - | - | K | T | - |
| Series | Name       | NO.      | 3UTR |    |    |    |     |     |     |     |     |     |   |   |   |   |   |   |   |
|        |            |          | 49   | 69 | 74 | 83 | 102 | 109 | 118 | 146 | 149 | 170 |   |   |   |   |   |   |   |
|        | VR2332     | EF536003 | G    | G  | A  | G  | T   | C   | C   | T   | G   | G   |   |   |   |   |   |   |   |
| HuN4   | HuN4       | EF635006 | A    | A  | A  | G  | T   | C   | C   | T   | A   | G   |   |   |   |   |   |   |   |
|        | HuN4-F40   | -        | G    | G  | -  | -  | -   | -   | -   | -   | -   | -   |   |   |   |   |   |   |   |
|        | HuN4-F60   | -        | G    | G  | -  | -  | -   | -   | -   | -   | -   | -   |   |   |   |   |   |   |   |
|        | HuN4-F112  | -        | G    | G  | -  | -  | -   | -   | -   | -   | -   | -   |   |   |   |   |   |   |   |
| NT0801 | NT0801     | HQ315836 | -    | G  | -  | -  | -   | -   | -   | -   | -   | G   |   |   |   |   |   |   |   |
|        | NT0801-P10 | KJ523894 | -    | G  | -  | -  | -   | -   | -   | -   | -   | G   |   |   |   |   |   |   |   |
|        | NT0801-P30 | KJ523895 | -    | G  | -  | -  | -   | -   | -   | -   | -   | G   |   |   |   |   |   |   |   |
|        | NT0801-P50 | KJ523896 | -    | G  | -  | -  | -   | -   | -   | -   | -   | G   |   |   |   |   |   |   |   |
|        | NT0801-P80 | KJ523897 | -    | G  | -  | -  | -   | -   | -   | -   | -   | A   |   |   |   |   |   |   |   |
| JXA1   | JXA1       | EF112445 | G    | G  | A  | -  | -   | C   | -   | T   | -   | -   |   |   |   |   |   |   |   |
|        | JXA1 P10   | FJ548854 | G    | G  | A  | -  | -   | C   | -   | T   | -   | -   |   |   |   |   |   |   |   |
|        | JXA1 P15   | FJ548855 | G    | G  | A  | -  | -   | C   | -   | T   | -   | -   |   |   |   |   |   |   |   |
|        | JXA1 P45   | FJ548851 | G    | G  | G  | -  | -   | C   | -   | C   | -   | -   |   |   |   |   |   |   |   |
|        | JXA1 P70   | FJ548852 | G    | G  | A  | -  | -   | C   | -   | C   | -   | -   |   |   |   |   |   |   |   |
|        | JXA1 P80   | FJ548853 | G    | G  | A  | -  | -   | C   | -   | C   | -   | -   |   |   |   |   |   |   |   |
|        | JXA1 P100  | KC422725 | G    | G  | A  | -  | -   | C   | -   | C   | -   | -   |   |   |   |   |   |   |   |
|        | JXA1 P110  | KC422726 | G    | G  | A  | -  | -   | C   | -   | C   | -   | -   |   |   |   |   |   |   |   |
|        | JXA1 P120  | KC422727 | G    | G  | A  | -  | -   | T   | -   | C   | -   | -   |   |   |   |   |   |   |   |
|        | JXA1-P130  | KC422728 | G    | G  | A  | -  | -   | C   | -   | C   | -   | -   |   |   |   |   |   |   |   |
|        | JXA1-P140  | KC422729 | G    | G  | A  | -  | -   | C   | -   | C   | -   | -   |   |   |   |   |   |   |   |

|        |            |          |   |   |   |   |   |   |   |   |   |   |
|--------|------------|----------|---|---|---|---|---|---|---|---|---|---|
| JX143  | JXA1-P150  | KC422730 | G | G | A | - | - | C | - | C | - | - |
|        | JXA1-P160  | KC422731 | G | G | A | - | - | C | - | C | - | - |
|        | JXA1-P170  | JQ804986 | G | G | A | - | - | C | - | C | - | - |
|        | JX143      | EU708726 | G | G | - | - | - | - | - | - | - | - |
|        | JXM20      | GQ499193 | G | G | - | - | - | - | - | - | - | - |
|        | JXM40      | GQ499194 | G | G | - | - | - | - | - | - | - | - |
|        | JXM60      | GQ499195 | G | G | - | - | - | - | - | - | - | - |
|        | JXM80      | GQ499196 | G | G | - | - | - | - | - | - | - | - |
|        | JXM100     | GQ475526 | G | G | - | - | - | - | - | - | - | - |
| GD     | GD         | EU825724 | G | G | - | - | - | - | - | - | - | - |
|        | GD-P100    | GU143913 | G | G | - | - | - | - | - | - | - | - |
| GDQY1  | GDQY1      | JN387271 | G | G | - | - | T | - | - | - | - | - |
|        | GDQY1VP65  | JN387272 | G | G | - | - | T | - | - | - | - | - |
|        | GDQY1VP80  | JN387273 | G | G | - | - | T | - | - | - | - | - |
|        | GDQY1VP100 | JN387274 | G | G | - | - | A | - | - | - | - | - |
| BJ     | BJ         | EU825723 | G | G | - | G | - | - | - | - | - | - |
|        | BJ-F20     | KP890337 | G | G | - | G | - | - | - | - | - | - |
|        | BJ-F40     | KP890338 | G | G | - | G | - | - | - | - | - | - |
|        | BJ-F80     | KP890340 | G | G | - | C | - | - | - | - | - | - |
|        | BJ-F100    | KP890341 | G | G | - | G | - | - | - | - | - | - |
|        | BJ-F150    | KP890342 | G | G | - | G | - | - | - | - | - | - |
| TP     | TP         | EU864233 | G | G | - | - | - | - | - | - | A | - |
|        | TP_P60     | GU232736 | G | G | - | - | - | - | - | - | G | - |
|        | TP_P90     | GU232737 | G | G | - | - | - | - | - | - | G | - |
| BB0907 | BB0907     | HQ315835 | G | G | - | - | - | - | C | - | - | - |
|        | BB0907-s34 | KM453698 | G | G | - | - | - | - | T | - | - | - |
|        | BB0907-F44 | KM453699 | G | G | - | - | - | - | C | - | - | - |

PRRSV VR2332 was used as a reference for the position of amino acid or nucleotide sites.
